# Supplementary material for: New Amino Naphthoquinone Derivatives as Anti-Trypanosoma cruzi Agents Targeting Trypanothione Reductase
Source: MDPI journal article supplement (doi:10.3390/pharmaceutics14061121), 2022-05-25
Supplement: s1 [file s1]

## Supporting Information

### **New amino naphthoquinone derivatives as anti-*Trypanosoma cruzi* agents targeting trypanothione reductase**

Christian Espinosa-Bustos<sup>1</sup>, Mariana Ortiz Pérez<sup>2</sup>, Alonzo Gonzalez-Gonzalez<sup>3</sup>, Ana María Zarate<sup>4</sup>, Gildardo Rivera<sup>3</sup>, Javier A. Belmont-Díaz<sup>5</sup>, Emma Saavedra<sup>5</sup>, Mauricio A. Cuellar,<sup>6</sup> Karina Vázquez\*<sup>2</sup> Cristian O. Salas\*<sup>4</sup>

<sup>1</sup> Departamento de Farmacia, Facultad de Química y de Farmacia, Pontificia Universidad Católica de Chile, Vicuña Mackenna 4860, Santiago 702843, Chile.

<sup>2</sup> Departamento de Parasitología, Facultad de Medicina Veterinaria y Zootecnia, Universidad Autónoma de Nuevo León, Francisco Villa 20, Gral. Escobedo 66054, México.

<sup>3</sup> Laboratorio de Biotecnología Farmacéutica, Centro de Biotecnología Genómica, Instituto Politécnico Nacional, Boulevard del Maestro s/n, Reynosa 88710, México.

<sup>4</sup> Departamento de Química Orgánica, Facultad de Química y de Farmacia, Pontificia Universidad Católica de Chile, Vicuña Mackenna 4860, Macul, Santiago 702843, Chile.

<sup>5</sup> Departamento de Bioquímica, Instituto Nacional de Cardiología Ignacio Chávez, México City 14080, México.

<sup>6</sup> Centro de Investigación Farmacopea Chilena, Escuela de Química y Farmacia, Facultad de Farmacia, Universidad de Valparaíso, Av. Gran Bretaña 1093, Valparaíso 2340000, Chile.

#### **Corresponding authors**

Karina Vázquez and Cristian O. Salas

Email: karina.vazquezcn@uanl.edu.mx (K.V.); cosalas@uc.cl (C.O.S.)

#### **Index**

<sup>1</sup>H and <sup>13</sup>C NMR of selected compounds .....pag 02-17

HRMS of selected compounds..... pag 18-26

**Table S1.** Effect of amino naphthoquinone derivatives upon culture growth of *T. cruzi* epimastigote forms expressed as % growth inhibition at 10 µM..... pag 27

**Table S2.** Protein-ligand interaction profiles for naphthoquinones and controls.....pag 28-29

# <sup>1</sup>H NMR for 2c

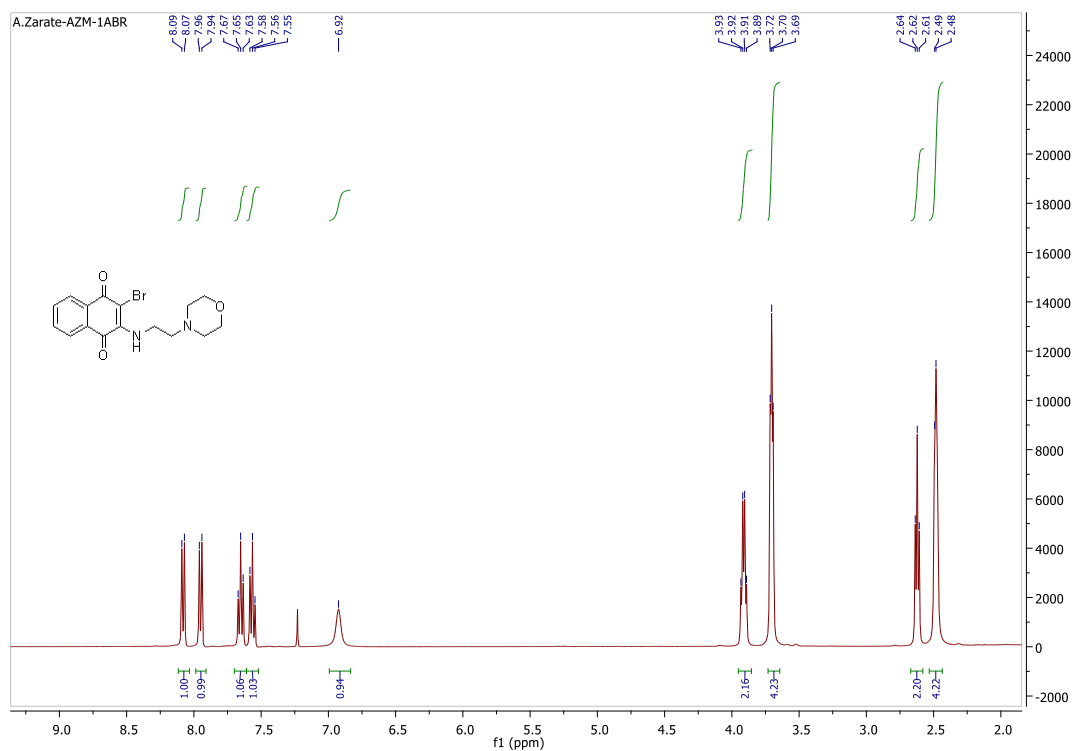

# <sup>13</sup>C NMR for 2c

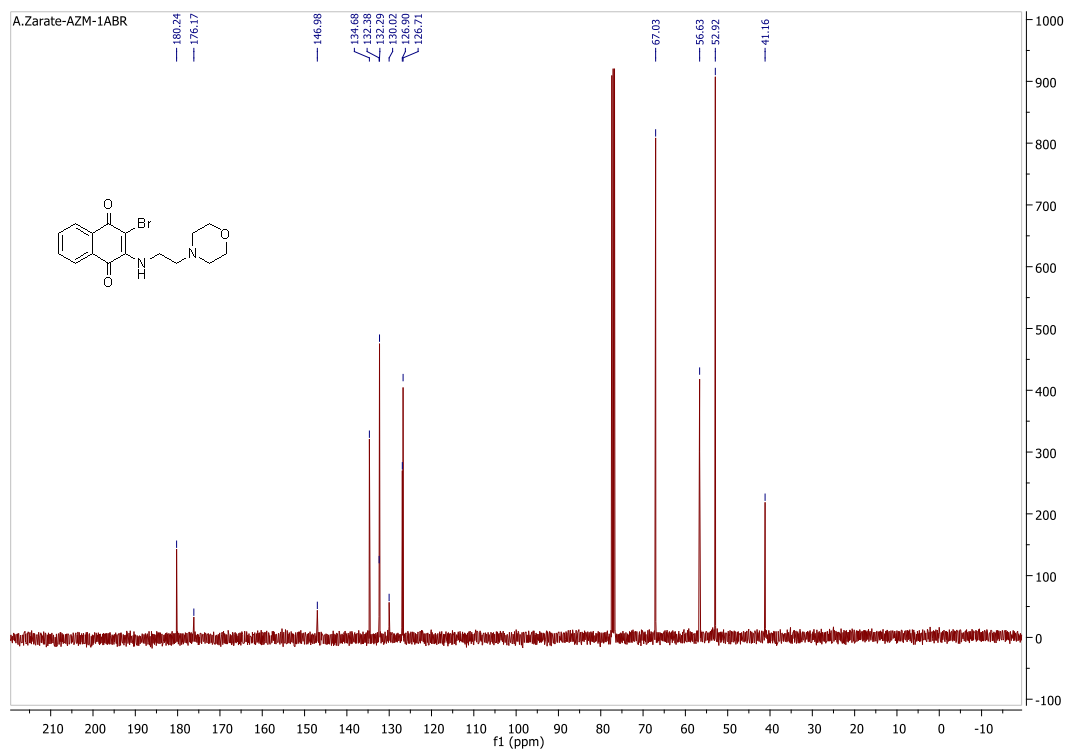

# <sup>1</sup>H NMR for 2d

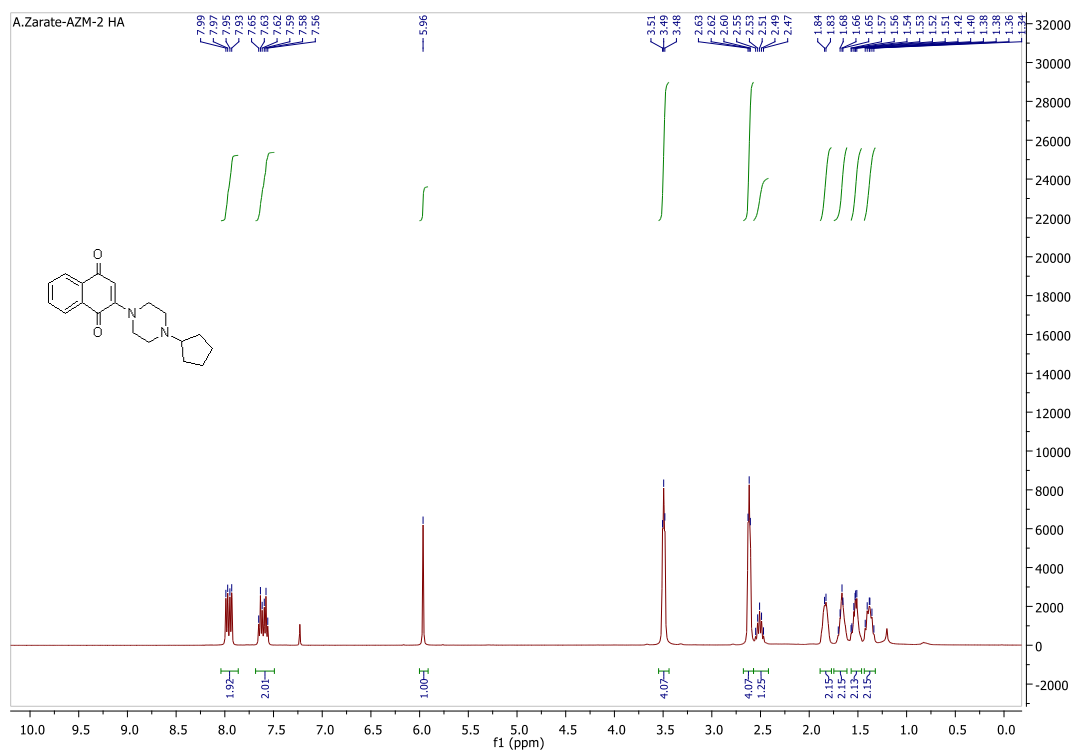

# <sup>13</sup>C NMR for 2d

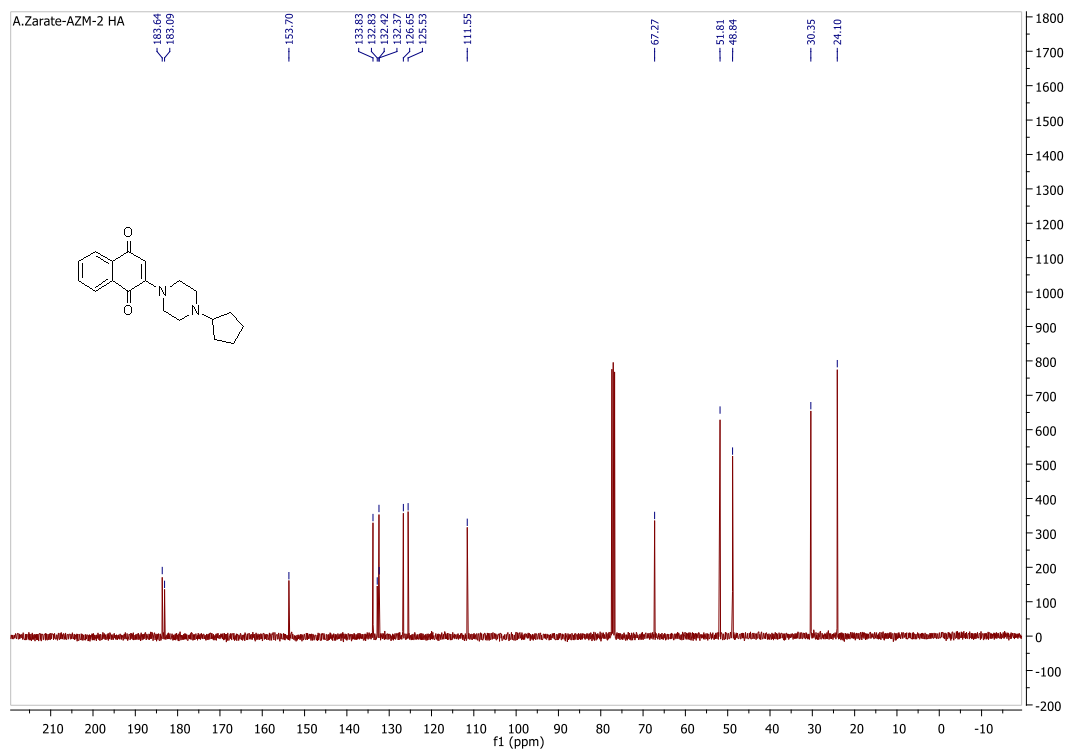

# <sup>1</sup>H NMR for 2e

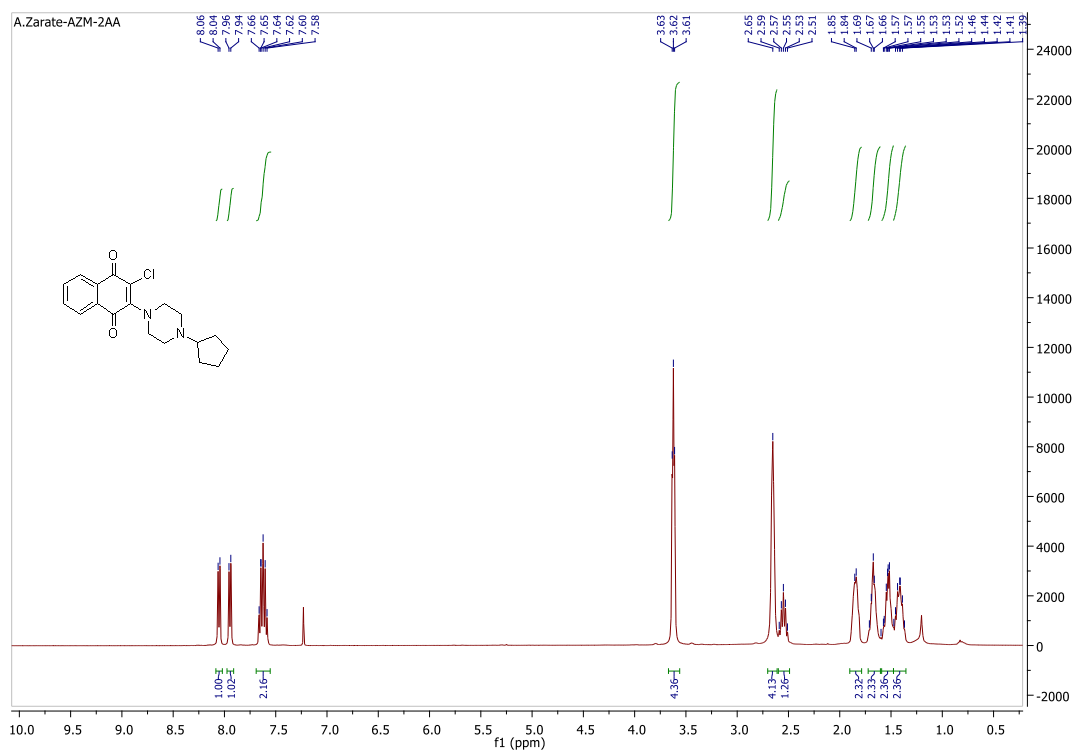

# <sup>13</sup>C NMR for 2e

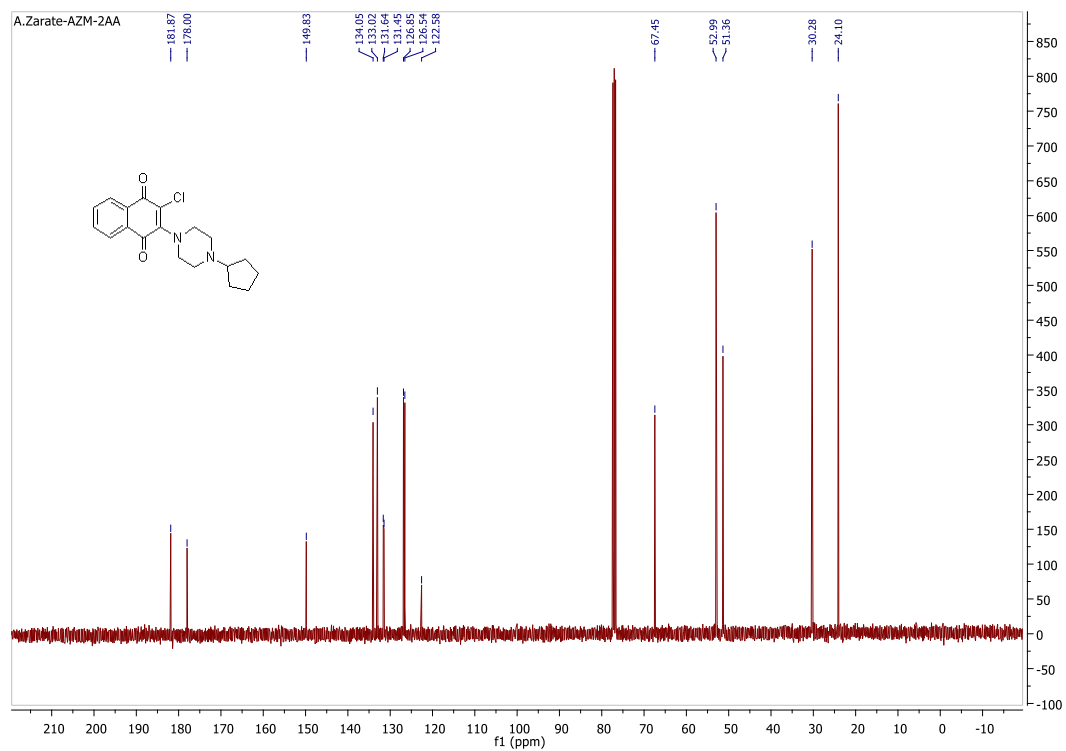

# <sup>1</sup>H NMR for 2f

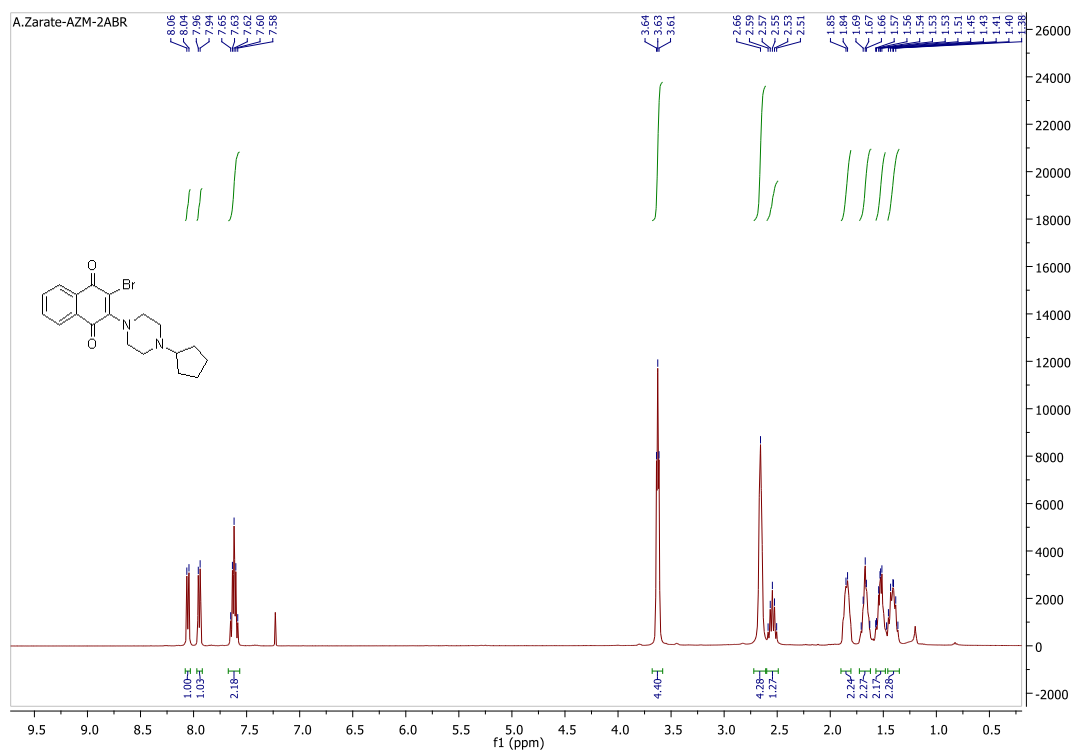

# <sup>13</sup>C NMR for 2f

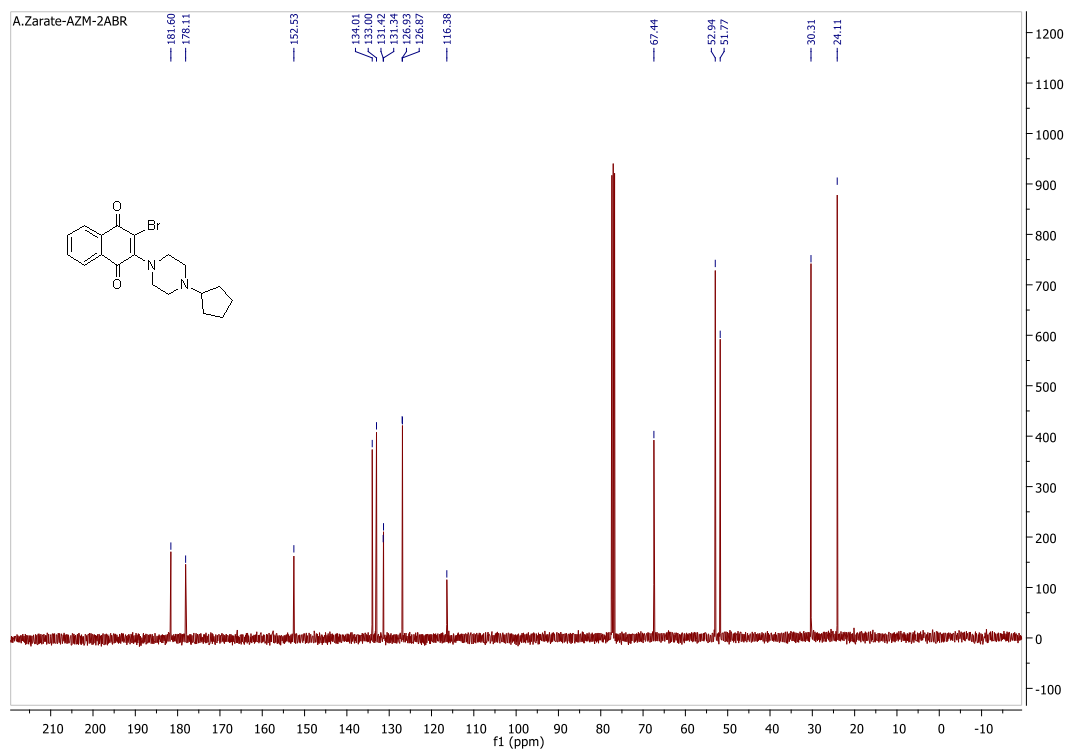

<sup>1</sup>H NMR for 2g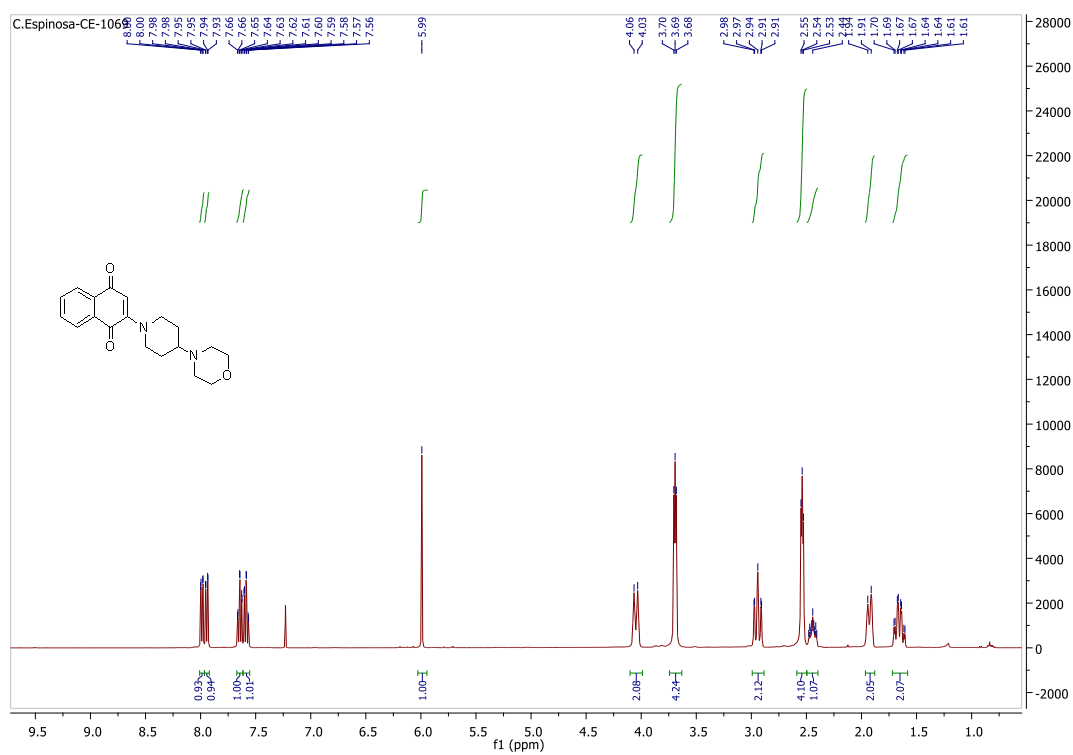 $^{13}\text{C}$  NMR for 2g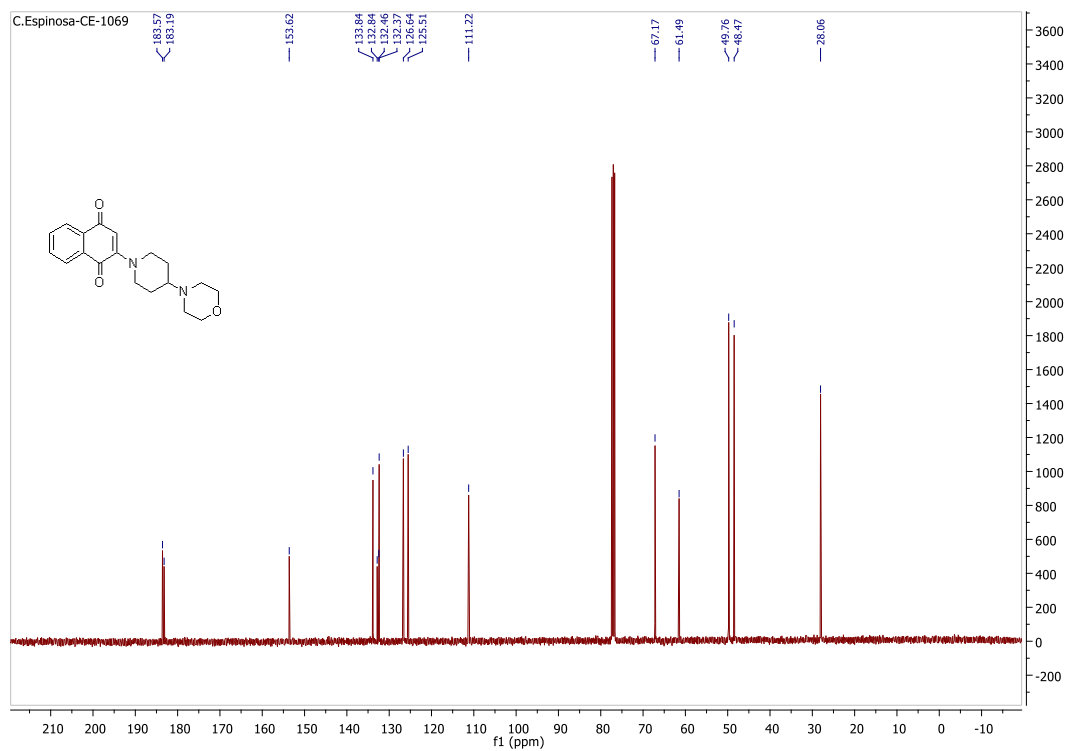

# <sup>1</sup>H NMR for 2h

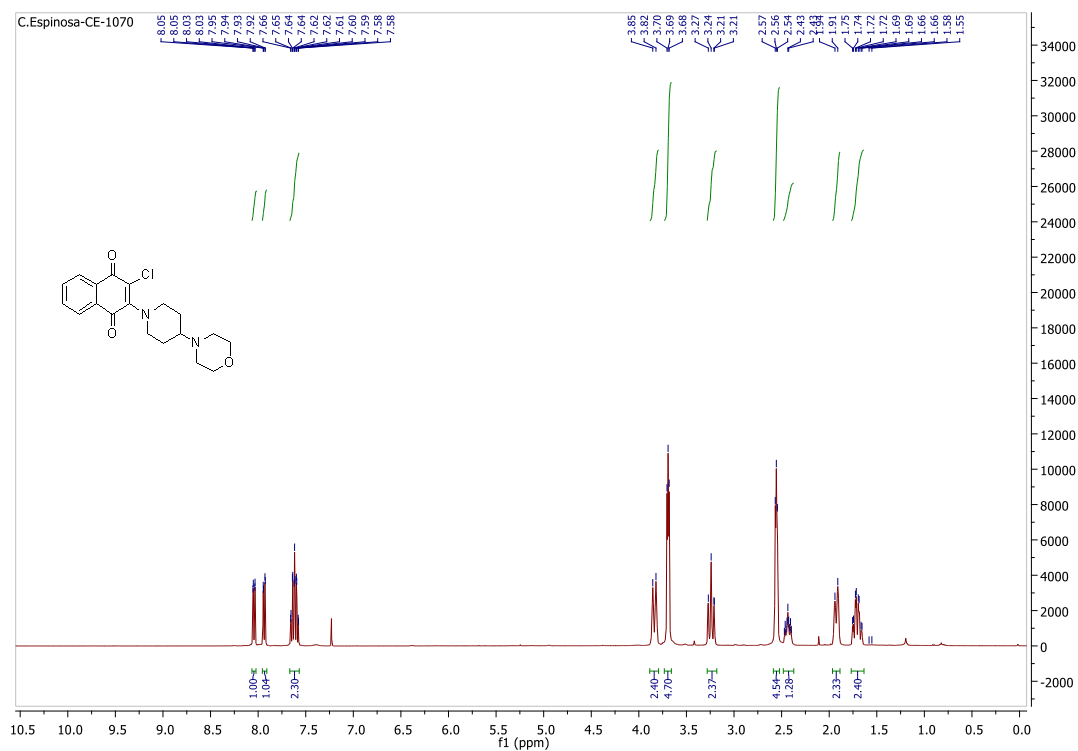

# <sup>13</sup>C NMR for 2h

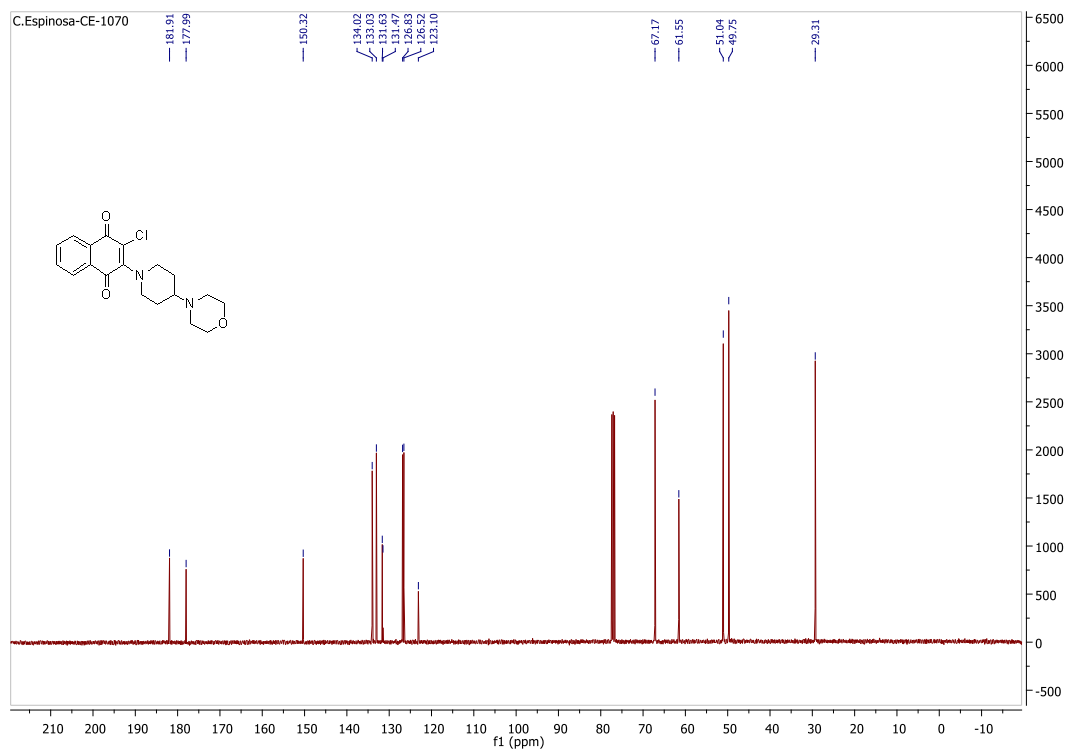

# <sup>1</sup>H NMR for 2i

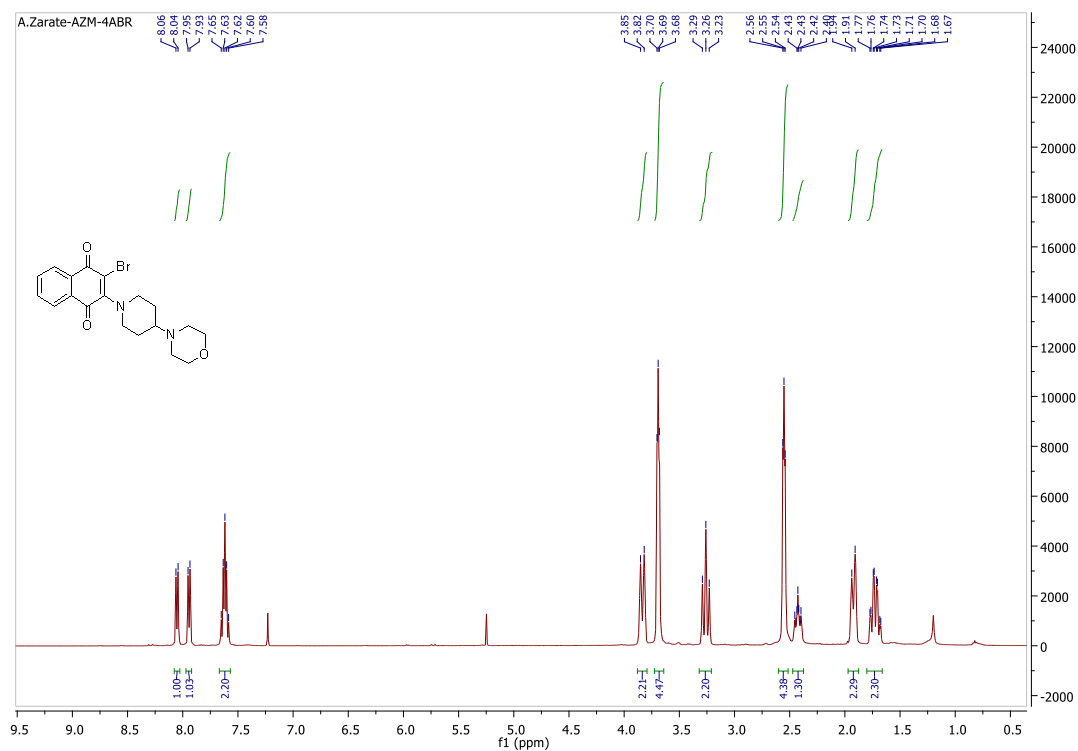

# <sup>13</sup>C NMR for 2i

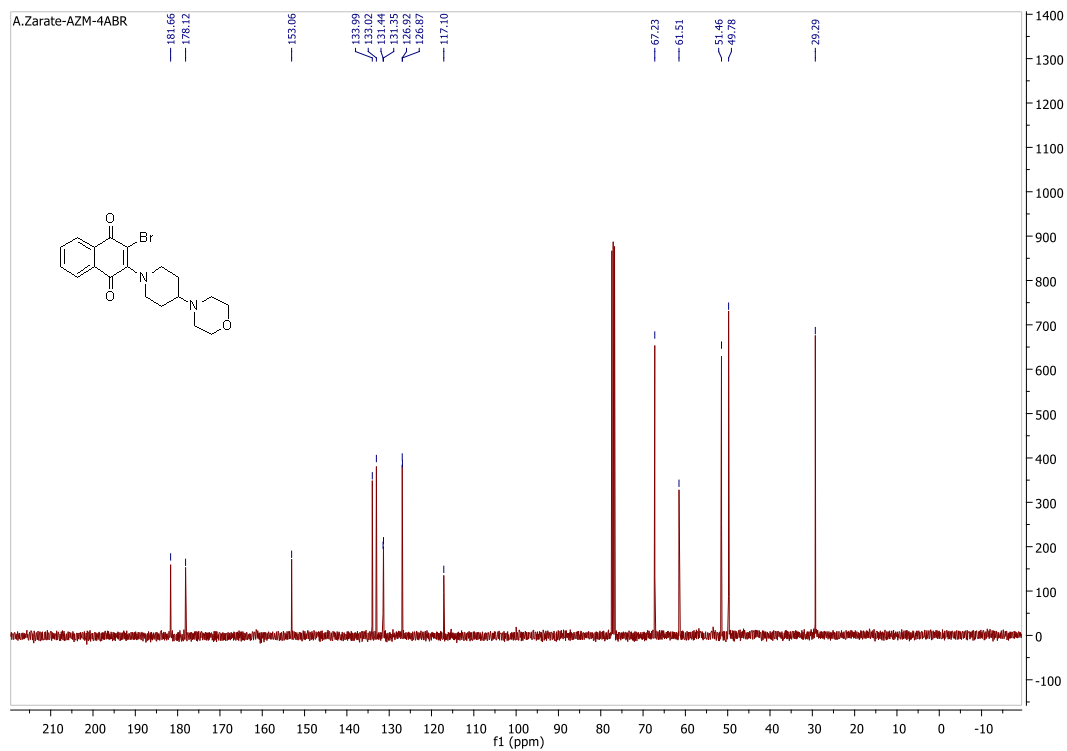



# <sup>1</sup>H NMR for 7a

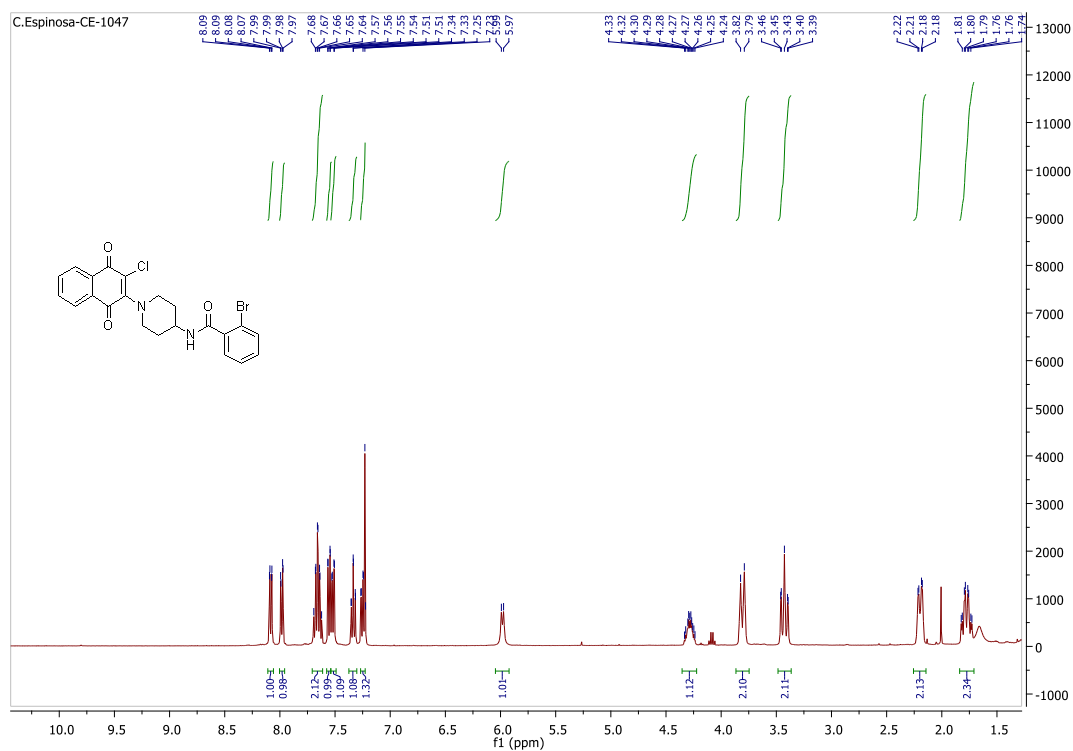

# <sup>13</sup>C NMR for 7a

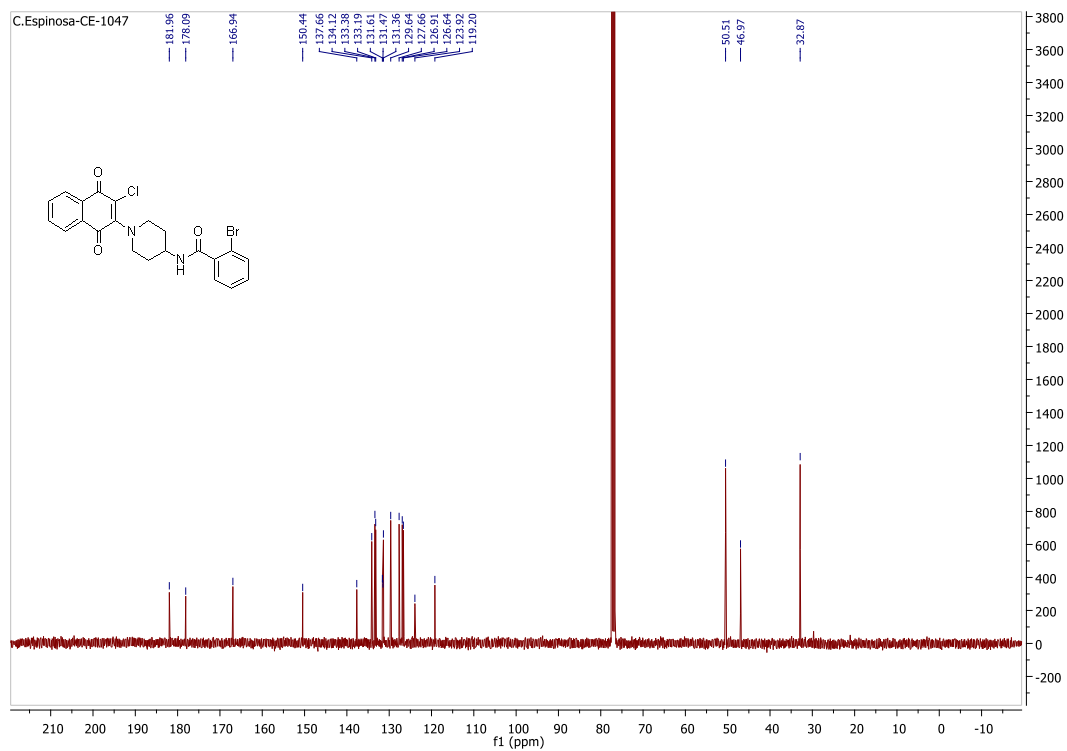

# <sup>1</sup>H NMR for 7b

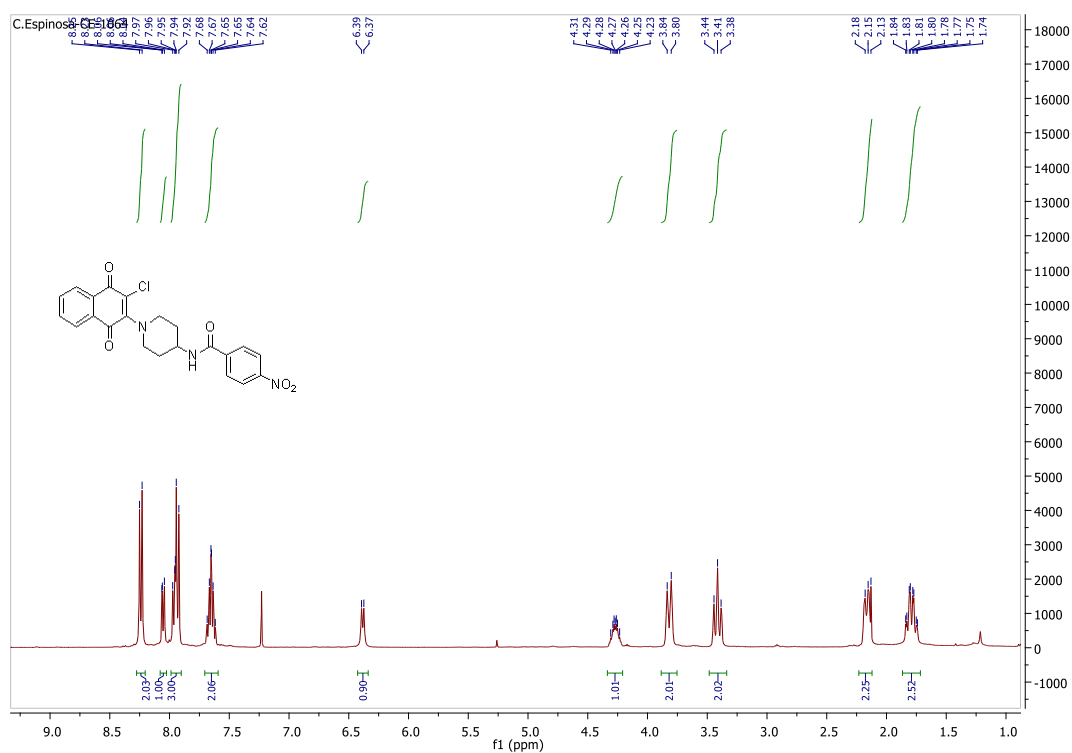

# <sup>13</sup>C NMR for 7b

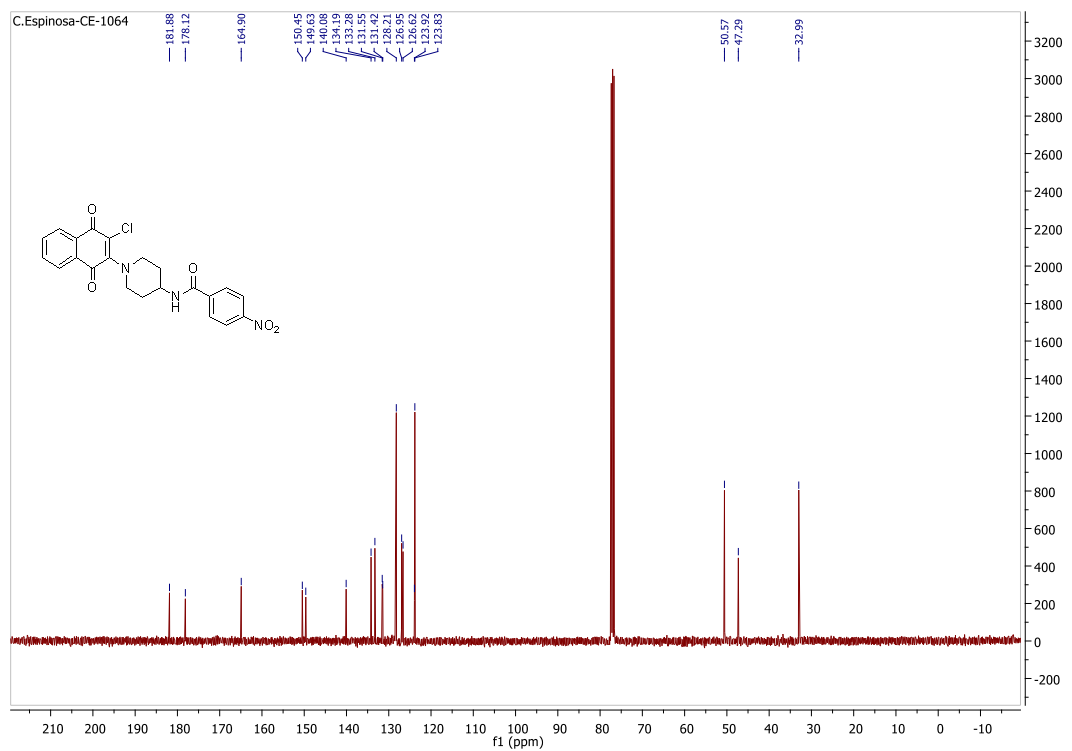

<sup>1</sup>H NMR for 7c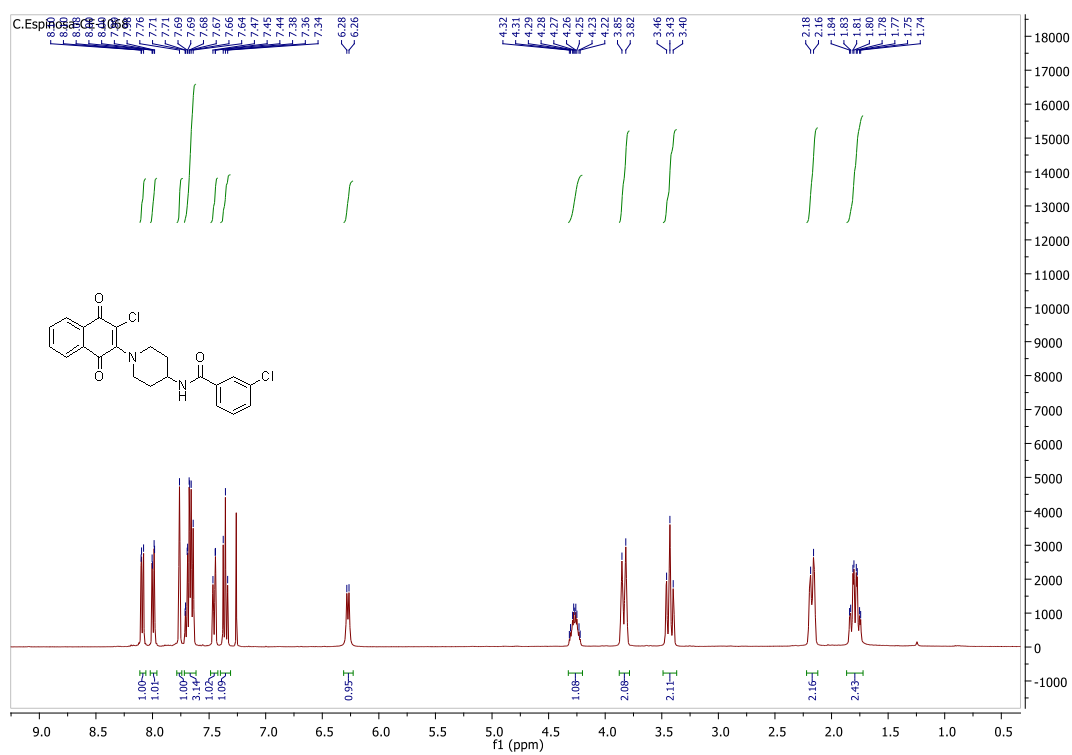 $^{13}\text{C}$  NMR for 7c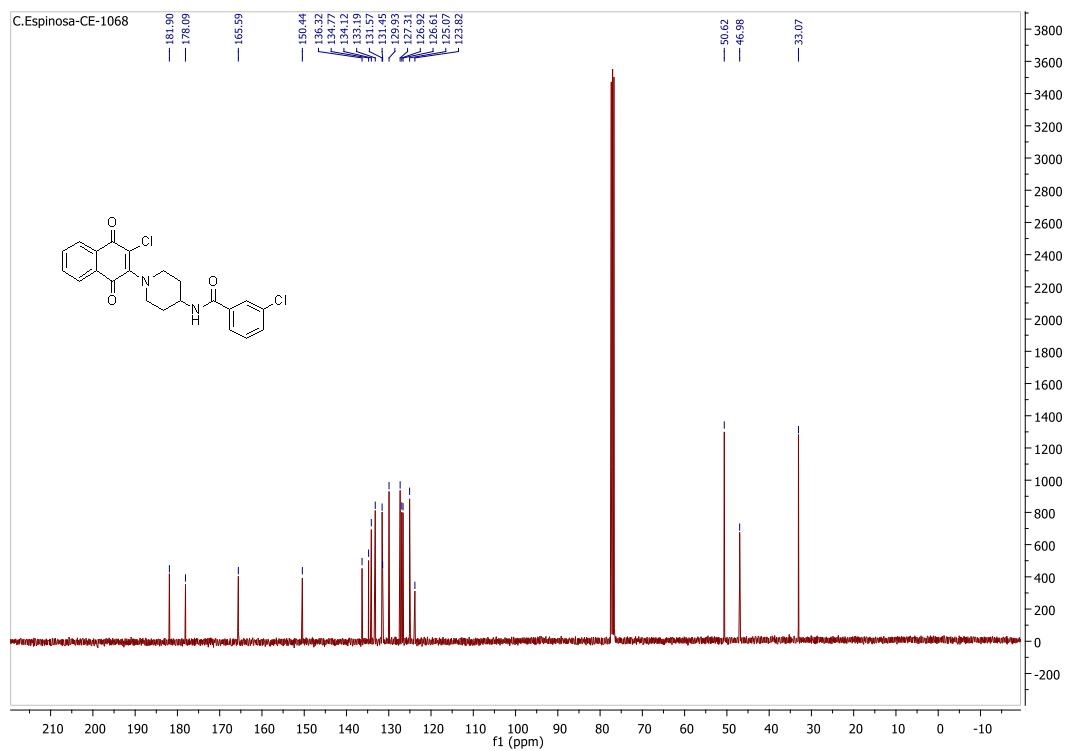

# <sup>1</sup>H NMR for 7d

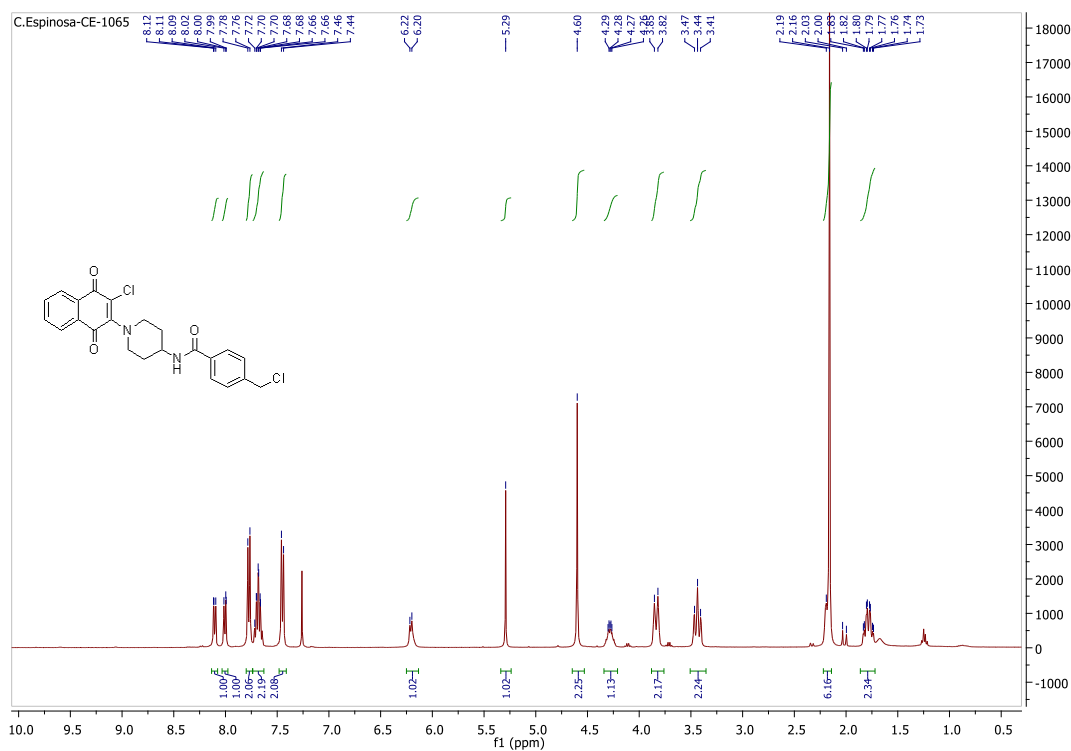

# <sup>13</sup>C NMR for 7d

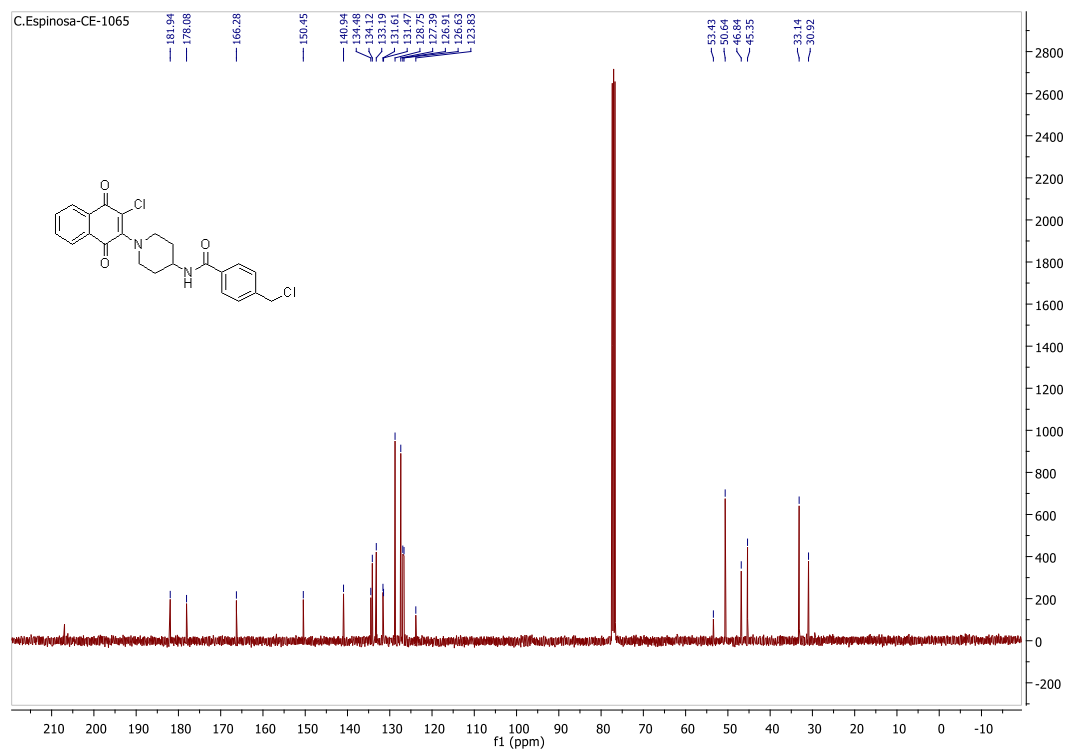

# <sup>1</sup>H NMR for 7e

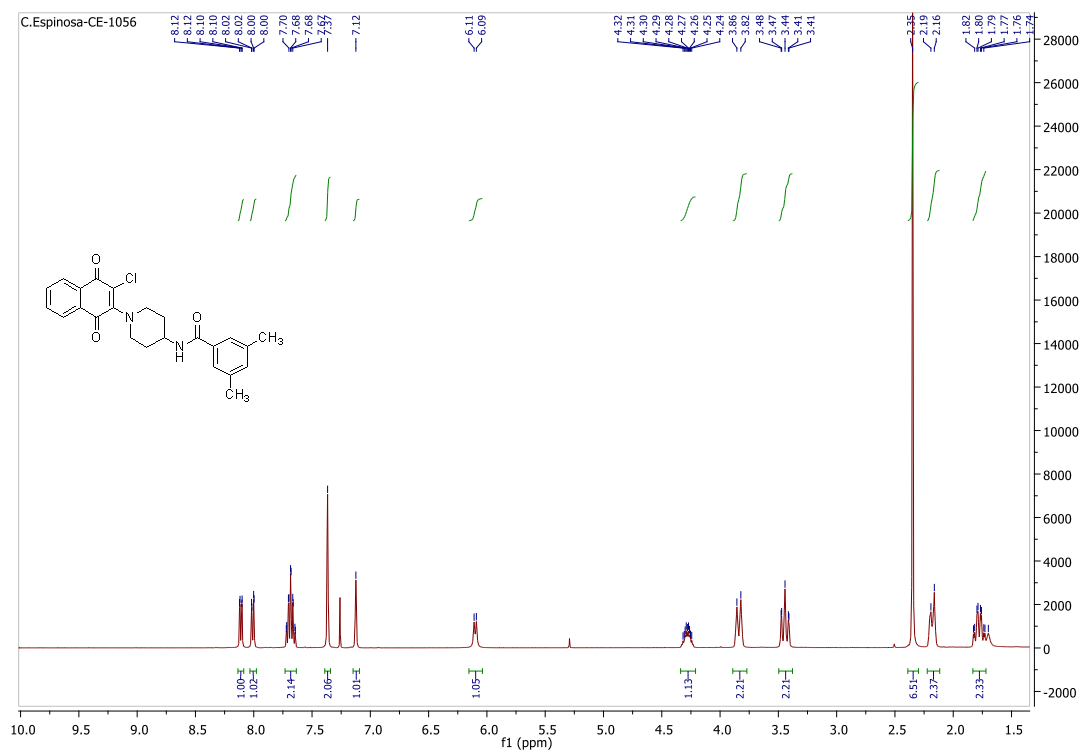

# <sup>13</sup>C NMR for 7e

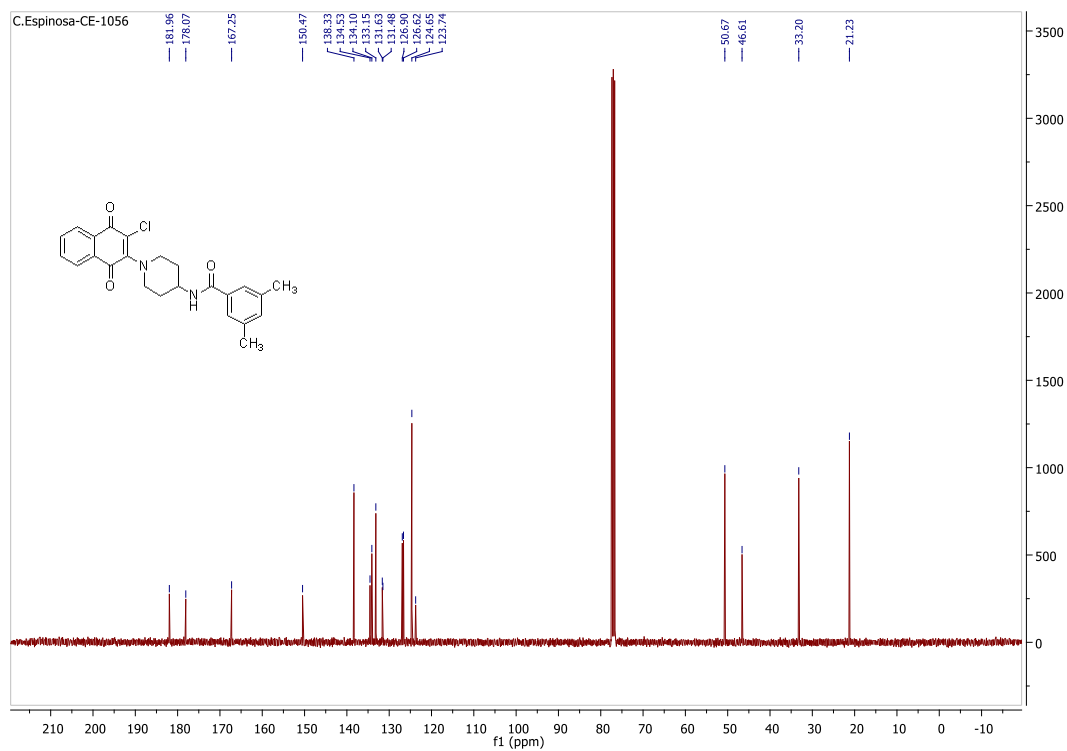

<sup>1</sup>H NMR for 7g

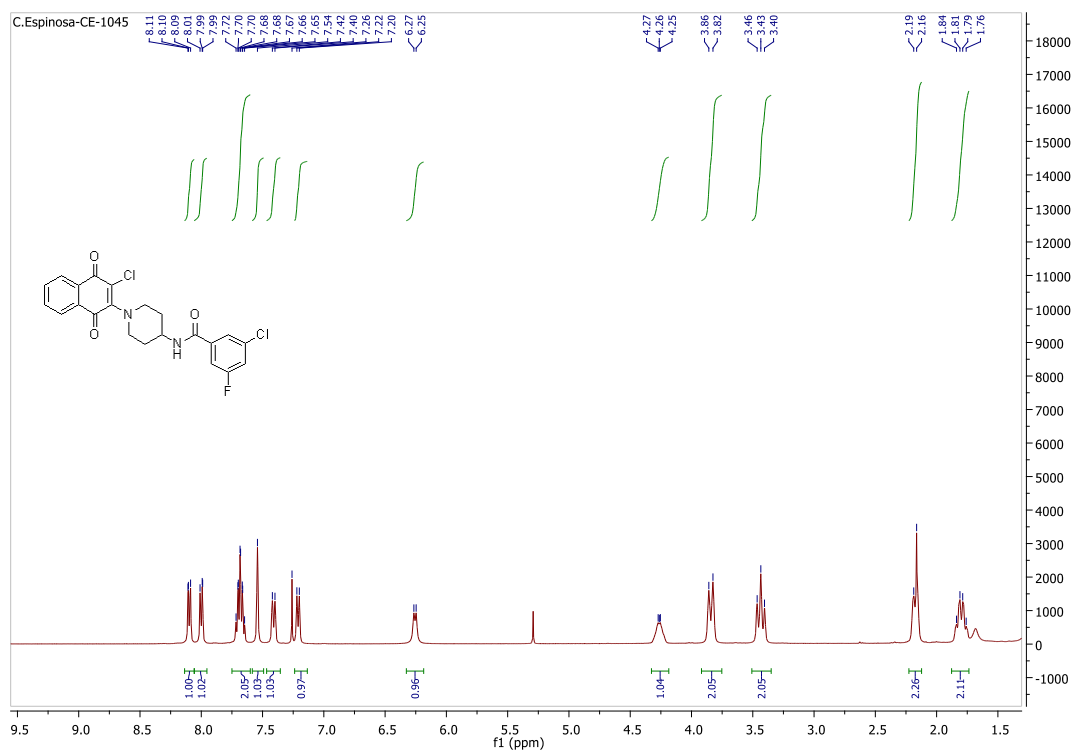

<sup>13</sup>C NMR for 7g

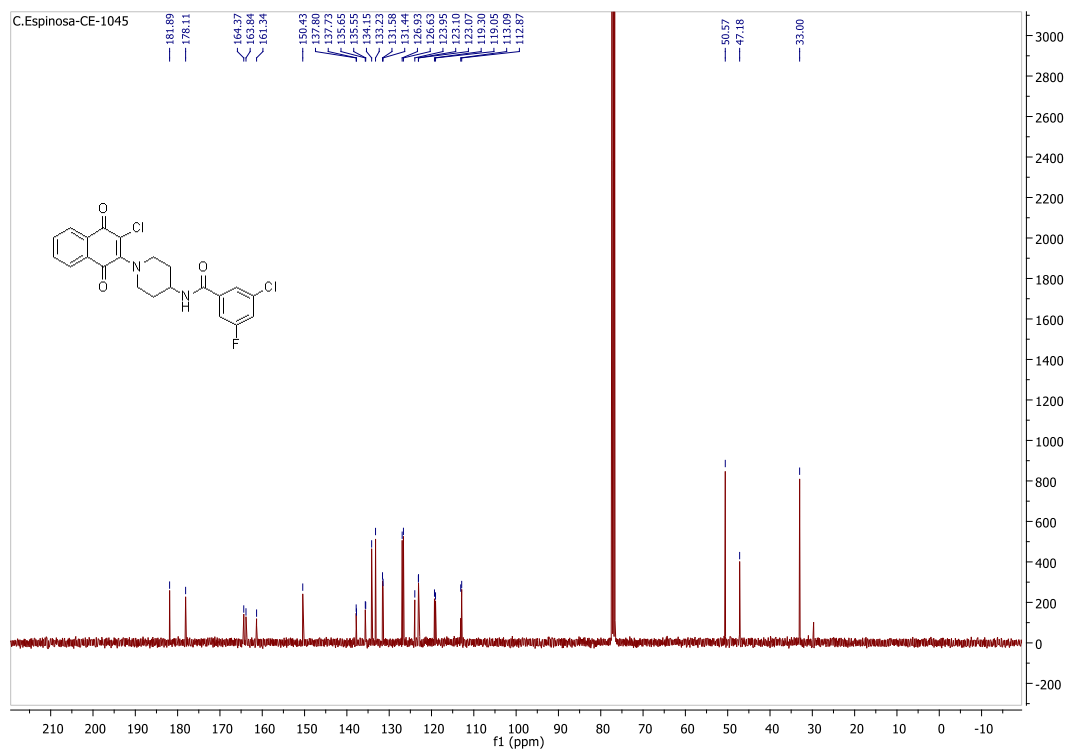

# <sup>1</sup>H NMR for 7h

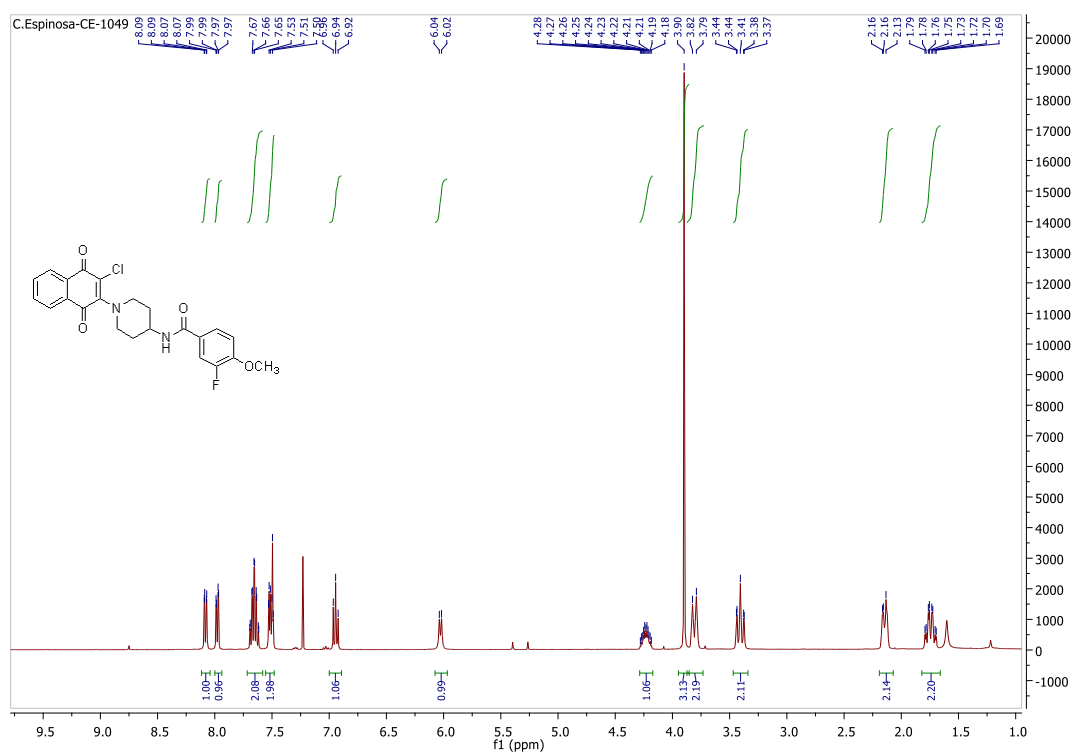

# <sup>13</sup>C NMR for 7h

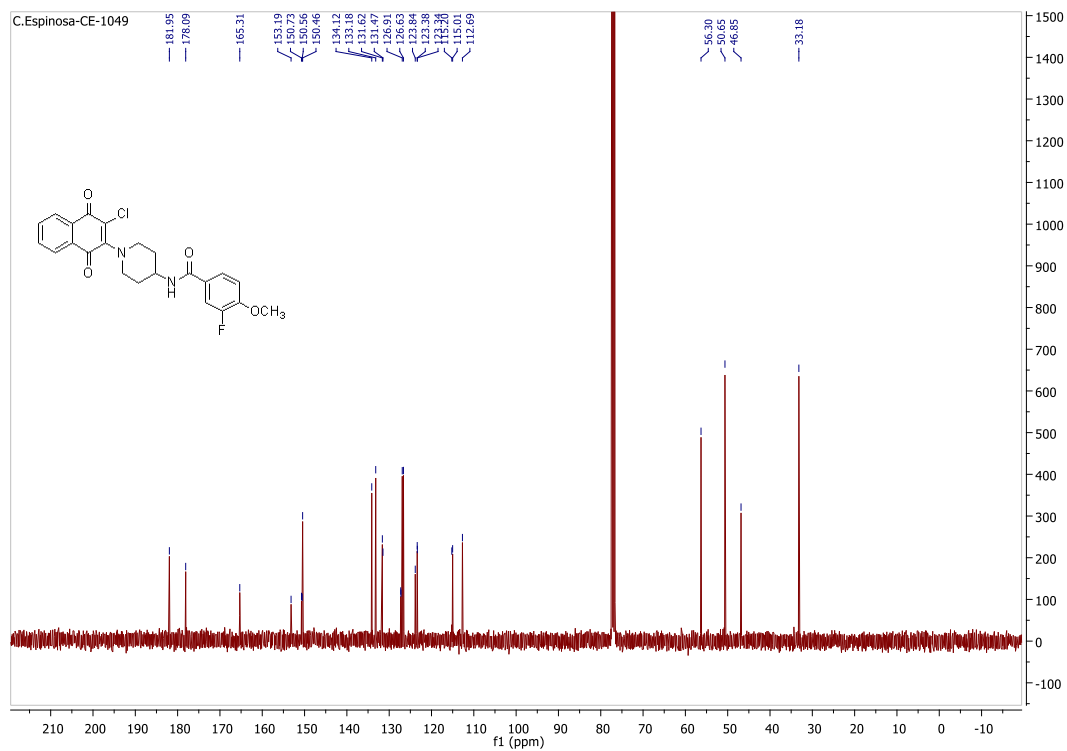

# <sup>1</sup>H NMR for 7i

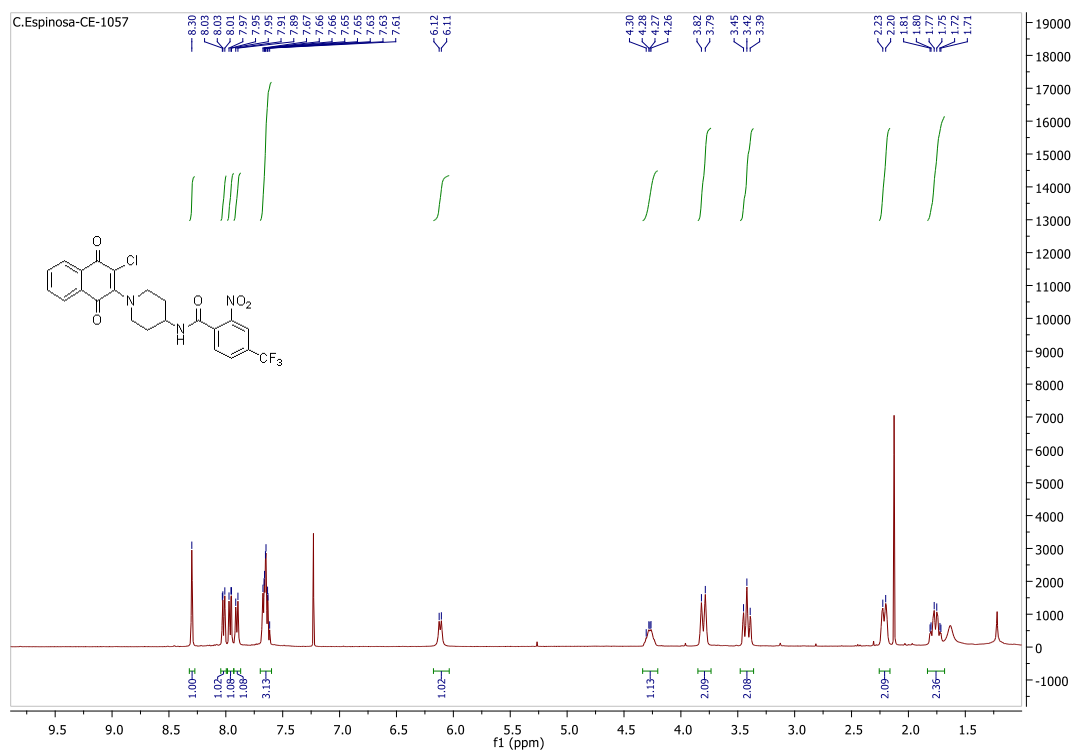

# <sup>13</sup>C NMR for 7i

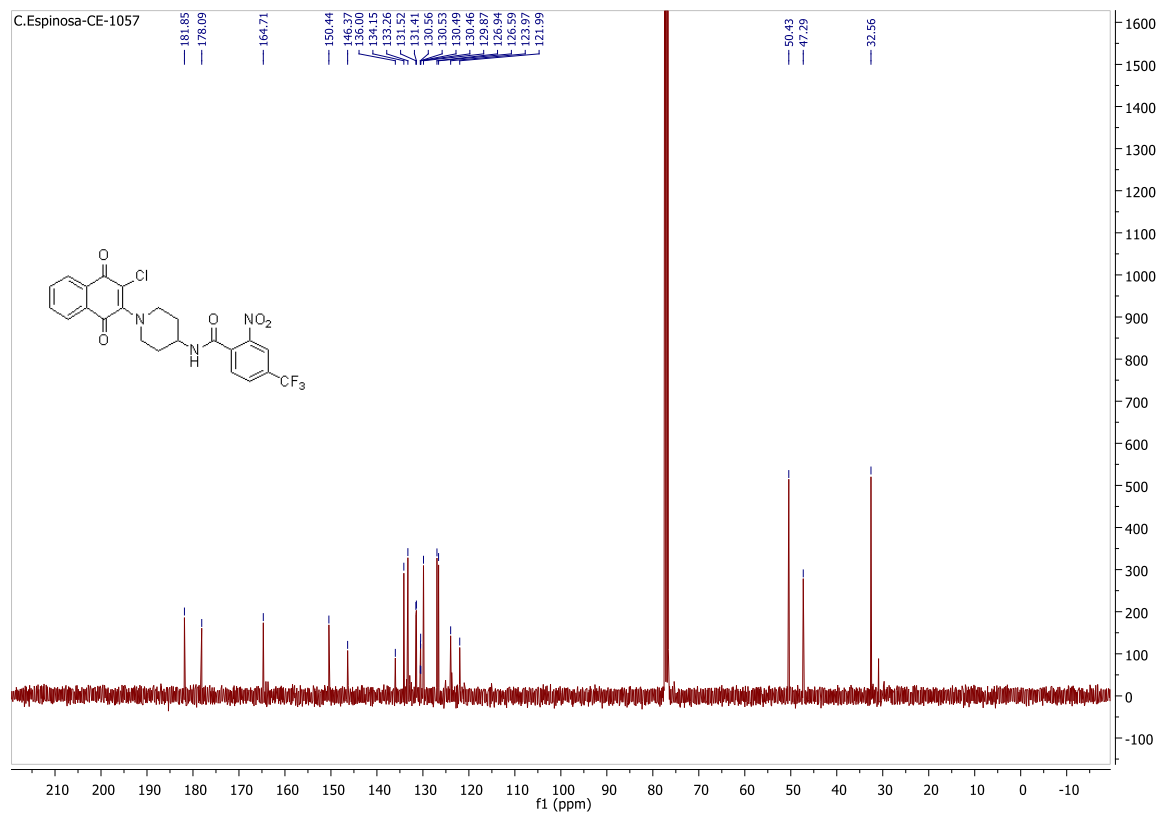



<sup>1</sup>H NMR for 7j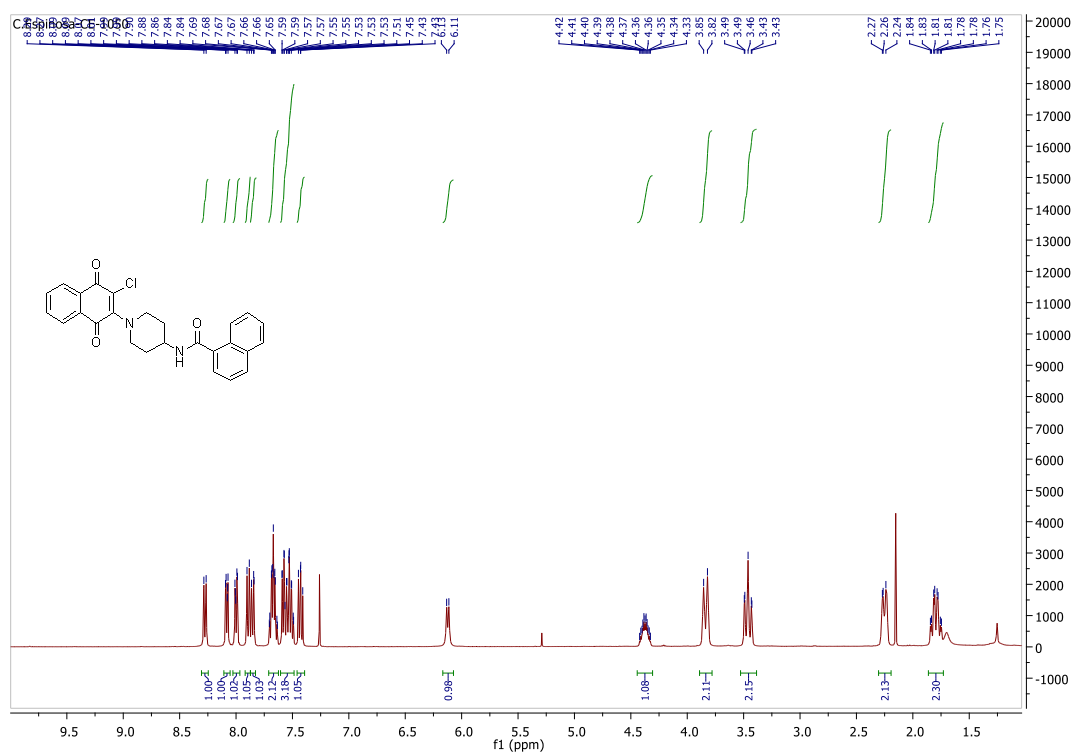<sup>13</sup>C NMR for 7j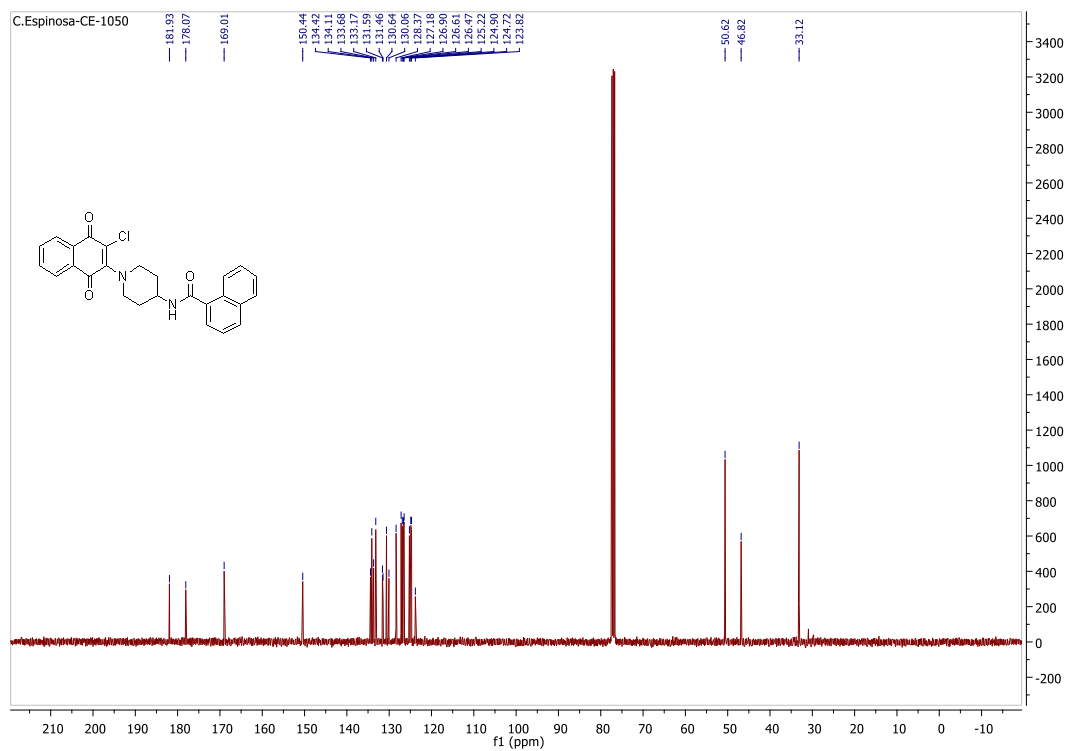

### Mass spectra compound 2c

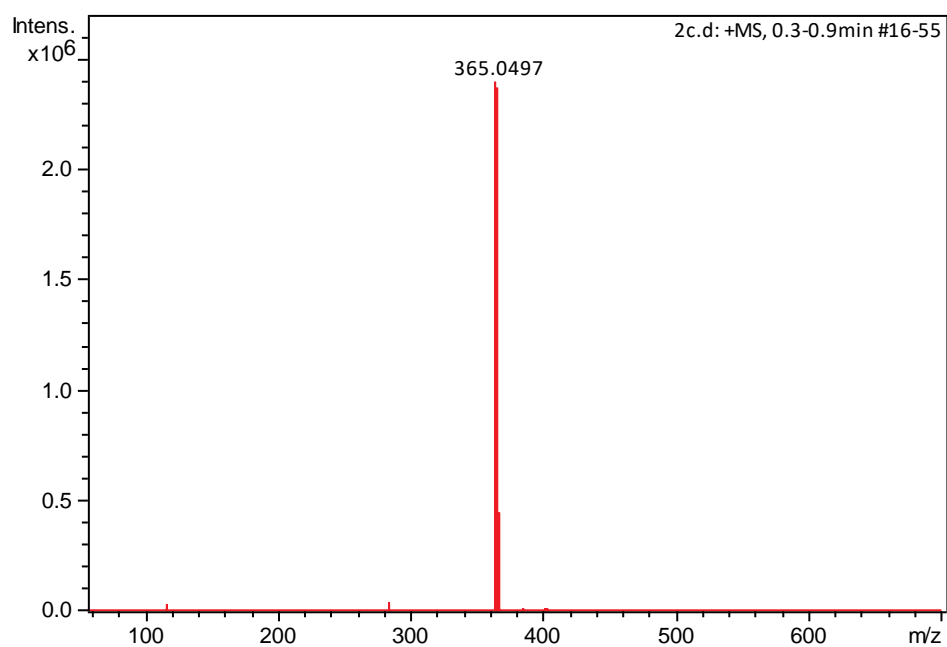

### Mass spectra compound 2d

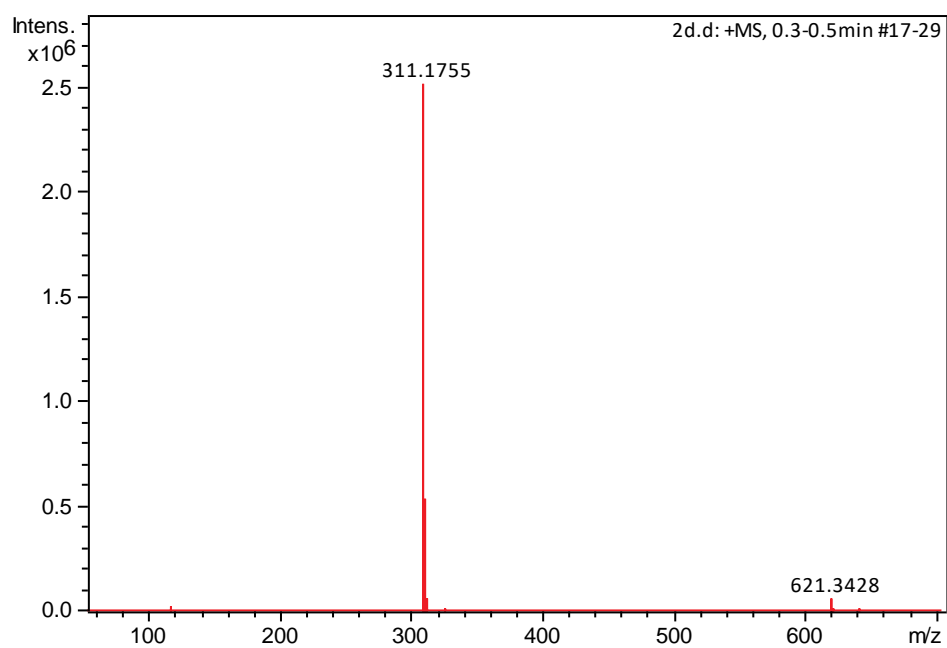

### Mass spectra compound 2e

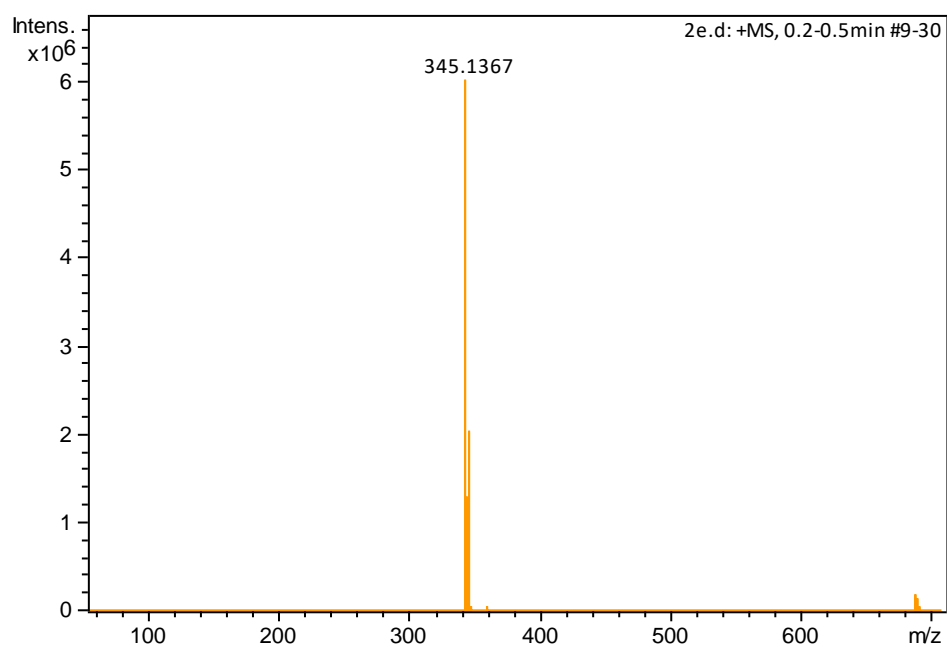

### Mass spectra compound 2f

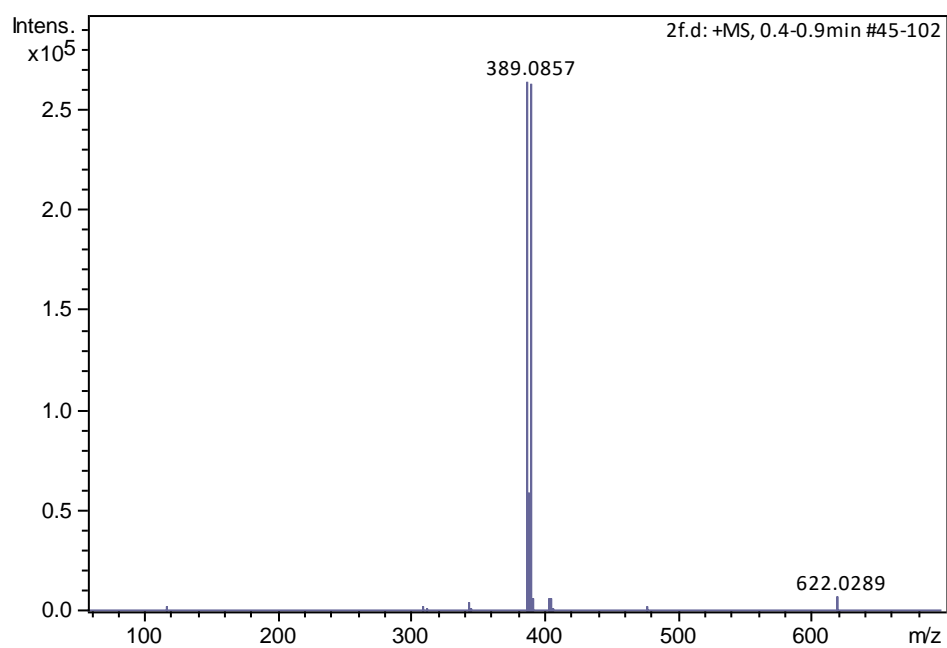

### Mass spectra compound 2g

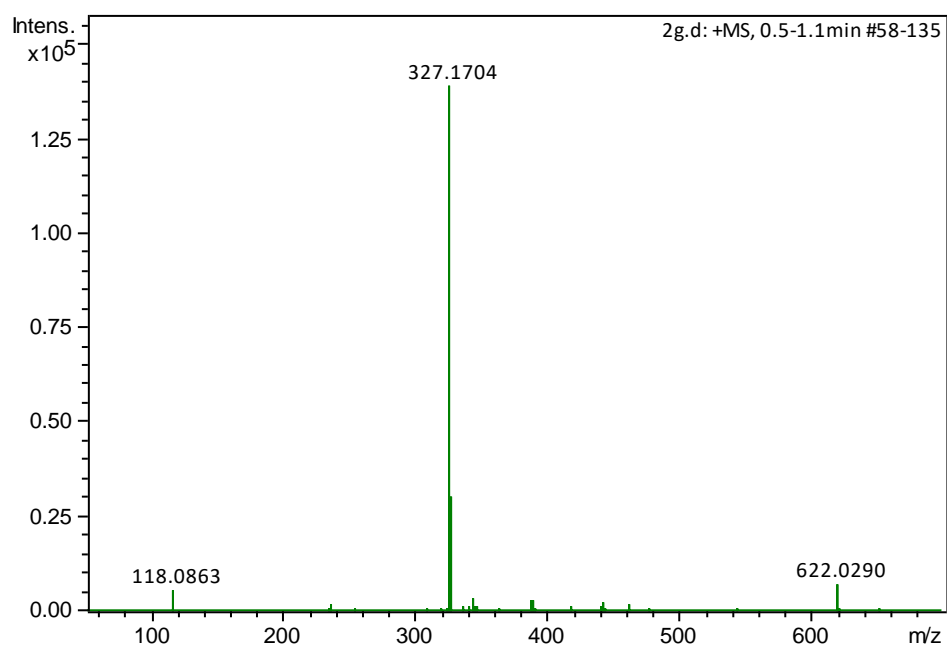

### Mass spectra compound 2h

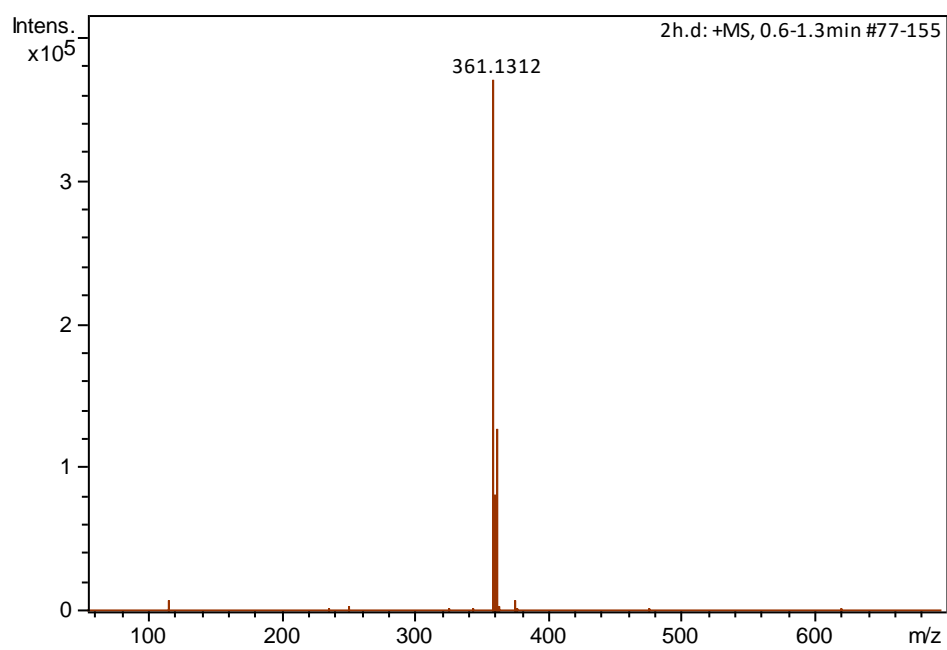

### Mass spectra compound 2i

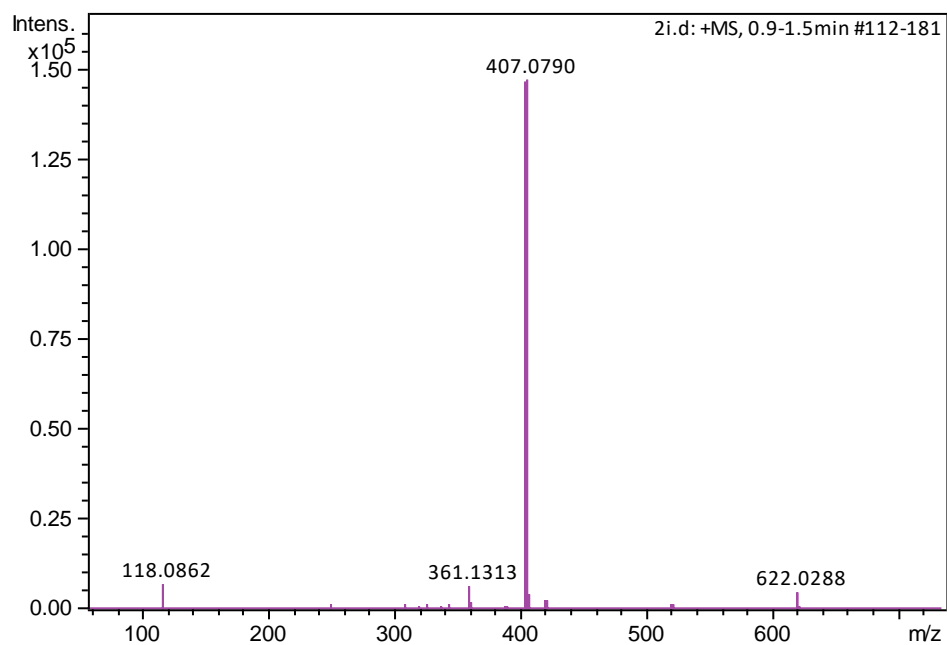

### Mass spectra compound 7a

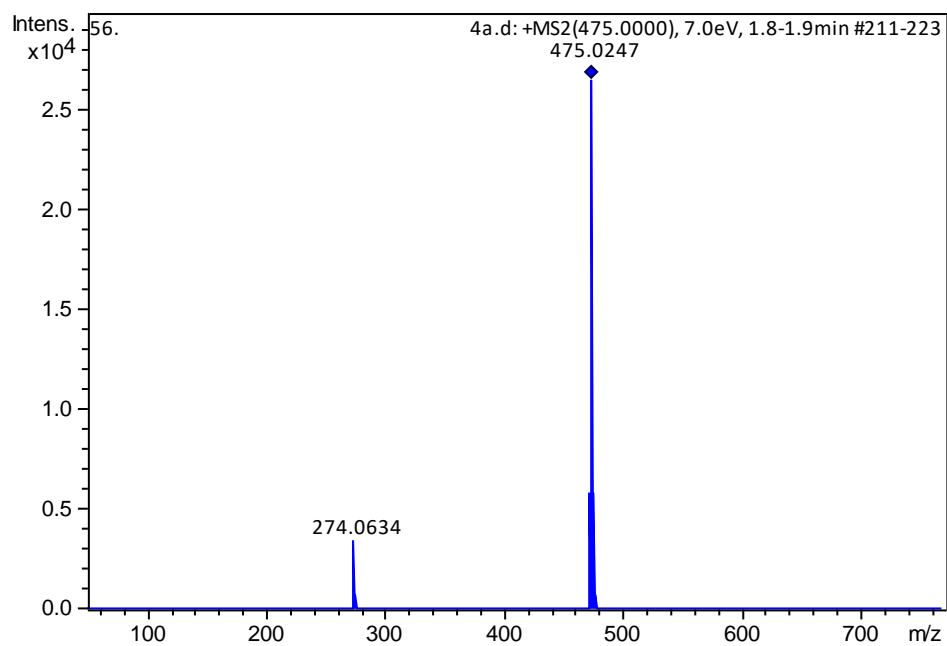

### Mass spectra compound 7b

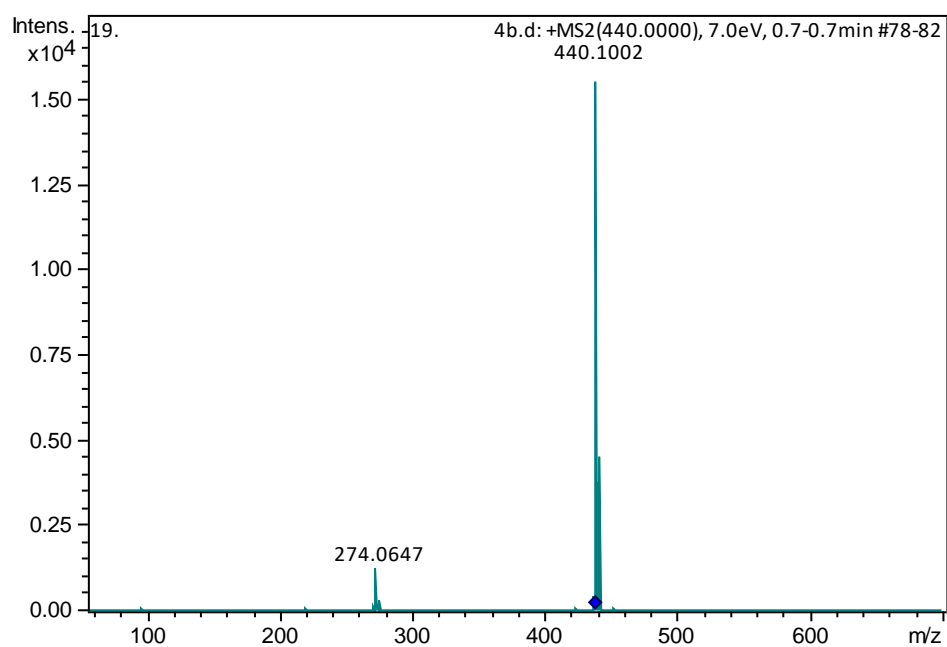

### Mass spectra compound 7c

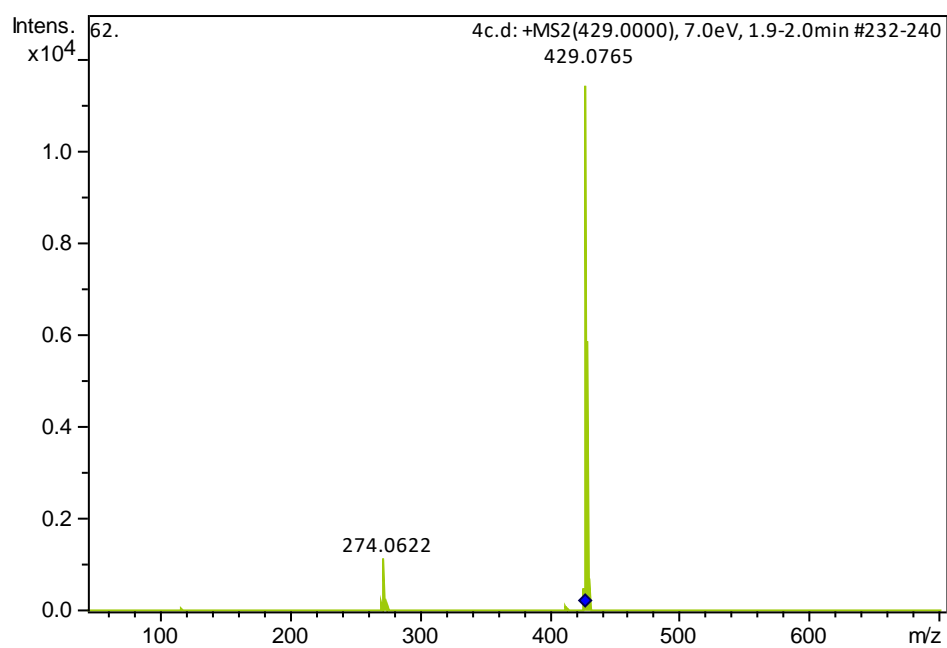

### Mass spectra compound 7d

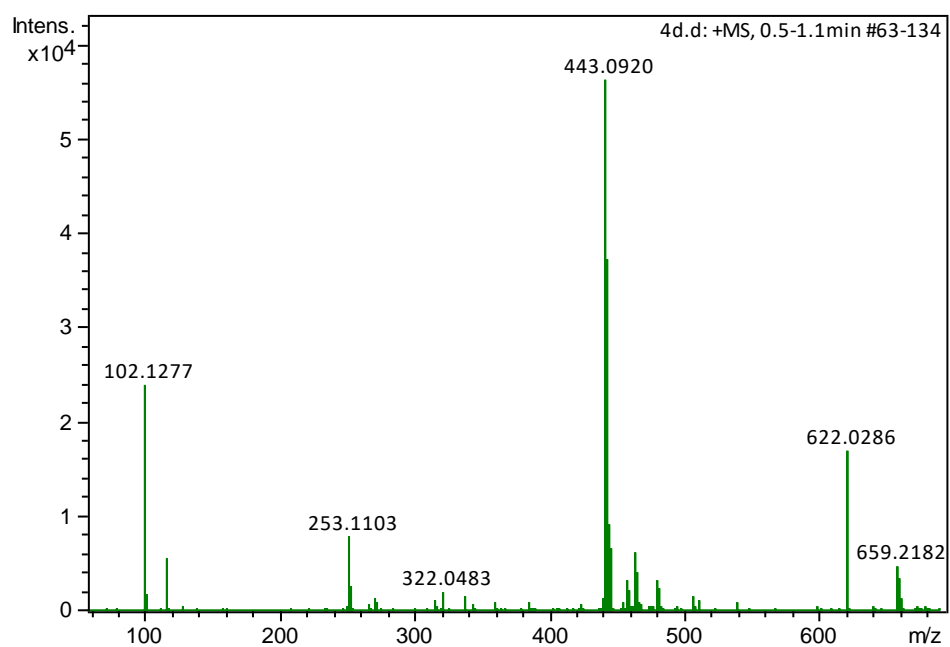

### Mass spectra compound 7e

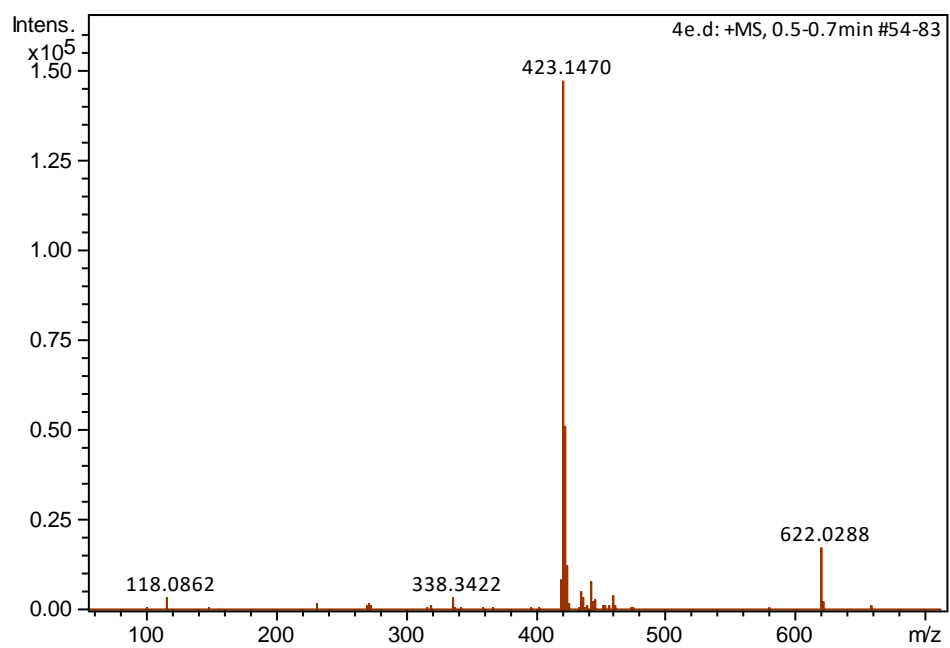

### Mass spectra compound 7f

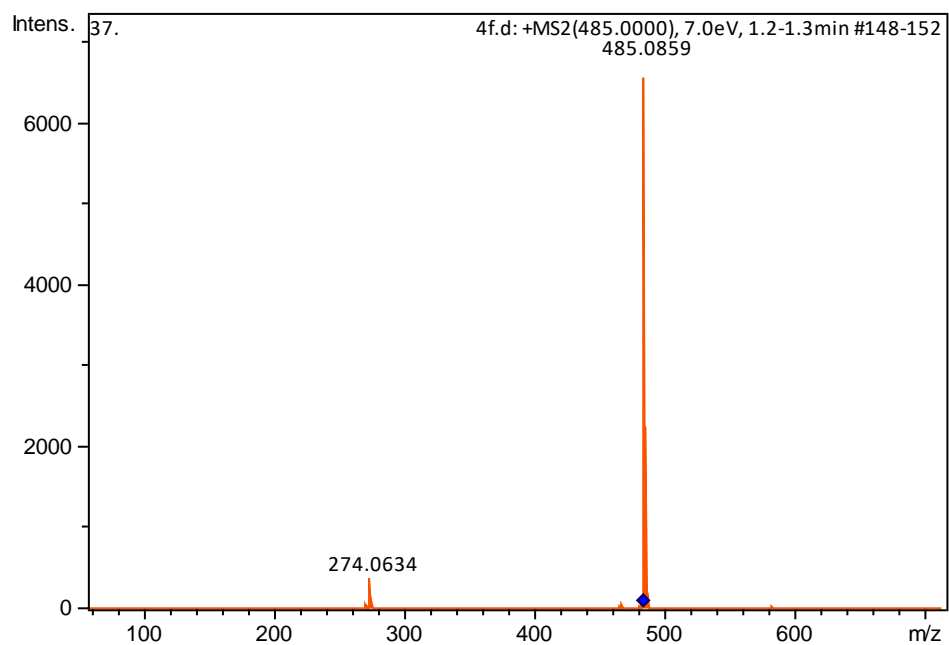

### Mass spectra compound 7g

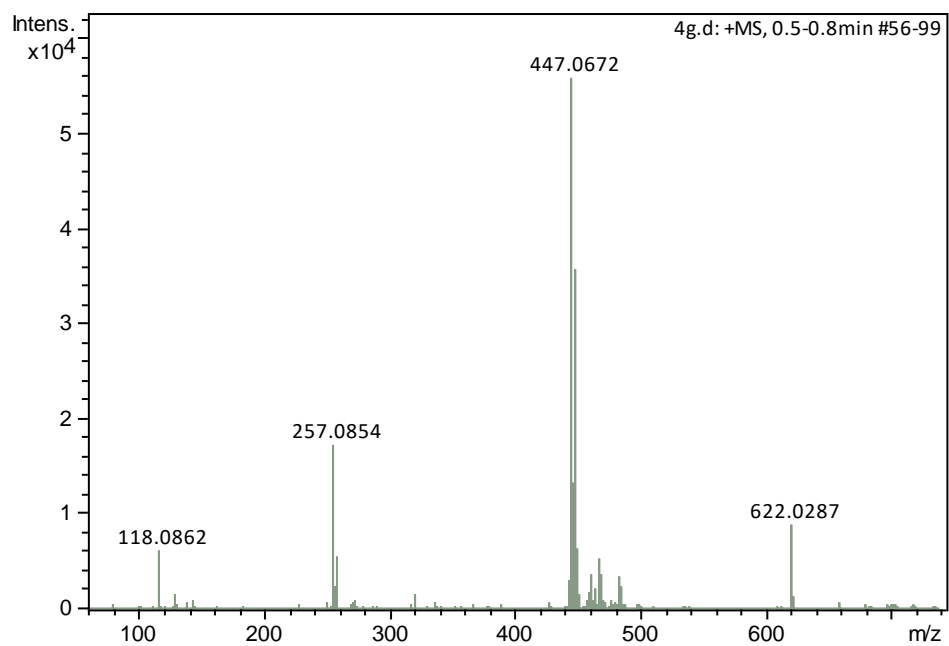



### Mass spectra compound 7h

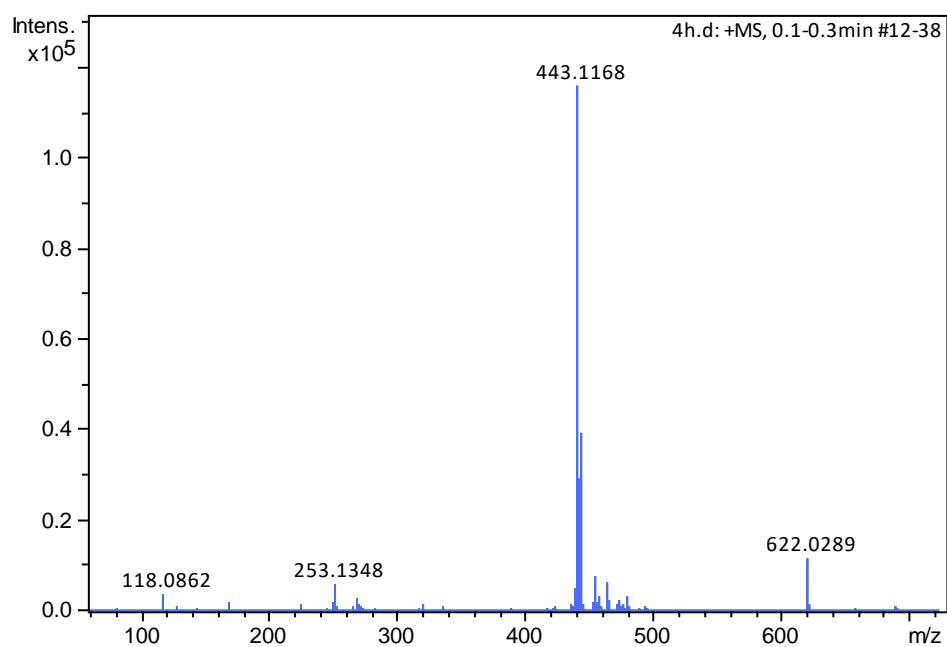

### Mass spectra compound 7i

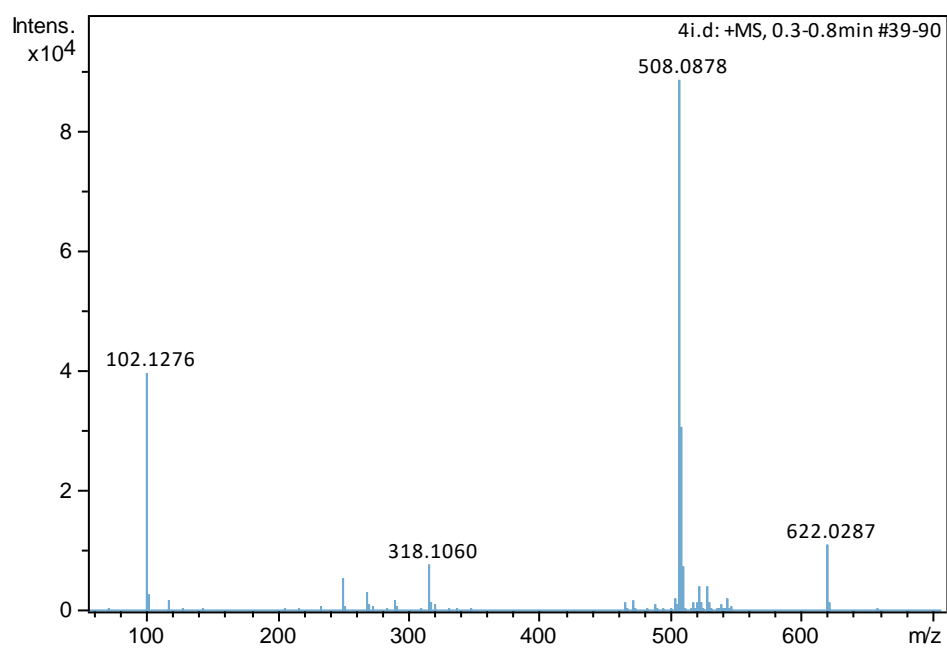

Mass spectra compound 7j

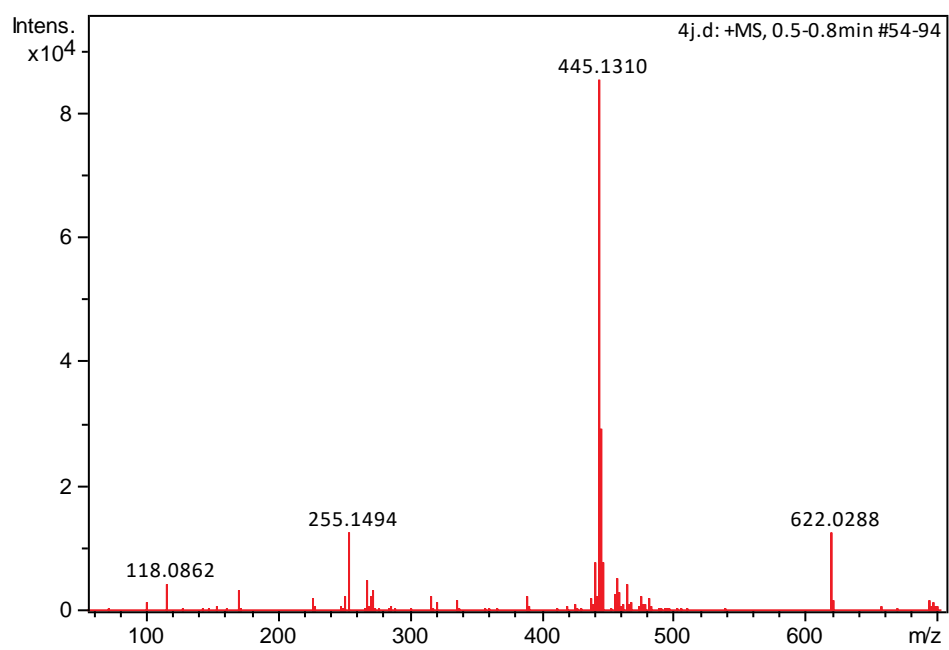

**Table S1.** Effect of amino naphthoquinone derivatives upon culture growth of *T. cruzi* epimastigote forms expressed as % growth inhibition at 10  $\mu$ M.

| Compound | %GI Epi INC-5  | %GI Epi NINOA  |
|----------|----------------|----------------|
| 2a       | 72 $\pm$ 0.01  | 65 $\pm$ 0.07  |
| 2b       | 95 $\pm$ 0.02  | 88 $\pm$ 0.06  |
| 2c       | 100 $\pm$ 0.08 | 100 $\pm$ 0.09 |
| 2d       | 93 $\pm$ 0.01  | 100 $\pm$ 0.5  |
| 2e       | 84 $\pm$ 0.07  | 100 $\pm$ 0.03 |
| 2f       | 95 $\pm$ 0.05  | 100 $\pm$ 0.09 |
| 2g       | 64 $\pm$ 0.0.8 | 68 $\pm$ 0.08  |
| 2h       | 100 $\pm$ 0.02 | 100 $\pm$ 0.08 |
| 2i       | 89 $\pm$ 0.03  | 92 $\pm$ 0.04  |
| 4a       | 100 $\pm$ 0.03 | 100 $\pm$ 0.09 |
| 4b       | 98 $\pm$ 0.08  | 96 $\pm$ 0.04  |
| 4c       | 100 $\pm$ 0.09 | 96 $\pm$ 0.03  |
| 4d       | 100 $\pm$ 0.1  | 100 $\pm$ 0.07 |
| 4e       | 96 $\pm$ 0.06  | 86 $\pm$ 0.05  |
| 4f       | 100 $\pm$ 0.07 | 100 $\pm$ 0.07 |
| 4g       | 90 $\pm$ 0.05  | 100 $\pm$ 0.08 |
| 4h       | 87 $\pm$ 0.03  | 98 $\pm$ 0.03  |
| 4i       | 78 $\pm$ 0.03  | 90 $\pm$ 0.07  |
| 4j       | 100 $\pm$ 0.05 | 98 $\pm$ 0.06  |
| Bnz      | 50 $\pm$ 0.36  | 99 $\pm$ 0.02  |

**Table S2.** Protein-ligand interaction profiles for naphthoquinones and controls.

| TR   | GR | 107ILEB | 110LEUB | 110SERB | 111TYRB | 114TYRB | 15SERB | 18LEUB | 33LEUB | 19GLUB | 34ALAB | 22TRPB | 37ARGB | 335THRB | 339THRB | 336PROB | 340PROB | 339ILEB | 343ILEB | 340ASNB | 343ALAB | 347ARGB | 394SERA | 396PHEA | 403PHEA | 397THRA | 404THRA | 398PROA | 405PROA | 399LEUA | 406META | 402LYSA | 409ALAA | 457THRA | 458ILEA |
|------|----|---------|---------|---------|---------|---------|--------|--------|--------|--------|--------|--------|--------|---------|---------|---------|---------|---------|---------|---------|---------|---------|---------|---------|---------|---------|---------|---------|---------|---------|---------|---------|---------|---------|---------|
| 2b   |    | 1       | 4       | 0       | 2       | 7       | 2      | 0      | 5      | 2      | 1      | 0      | 3      | 0       | 0       | 5       | 1       | 6       | 6       | 4       | 0       | 2       | 0       | 1       | 2       | 0       | 2       | 1       | 0       | 5       | 2       | 1       | 0       | 0       | 1       |
| 2a   |    | 0       | 0       | 0       | 2       | 11      | 0      | 0      | 10     | 1      | 5      | 0      | 6      | 0       | 0       | 7       | 0       | 9       | 9       | 6       | 0       | 6       | 0       | 0       | 0       | 0       | 0       | 0       | 0       | 2       | 1       | 0       | 0       | 0       | 0       |
| 2c   |    | 0       | 4       | 0       | 1       | 7       | 1      | 0      | 6      | 2      | 2      | 0      | 5      | 0       | 0       | 5       | 1       | 6       | 7       | 6       | 0       | 4       | 0       | 1       | 0       | 0       | 0       | 1       | 0       | 3       | 0       | 0       | 0       | 0       | 1       |
| 2e   |    | 1       | 2       | 0       | 1       | 4       | 0      | 0      | 1      | 1      | 5      | 1      | 5      | 0       | 0       | 6       | 1       | 5       | 8       | 3       | 0       | 2       | 0       | 8       | 8       | 0       | 0       | 1       | 0       | 2       | 2       | 0       | 0       | 0       | 0       |
| 2d   |    | 0       | 2       | 0       | 2       | 8       | 0      | 0      | 5      | 2      | 4      | 2      | 6      | 1       | 0       | 6       | 2       | 9       | 10      | 5       | 0       | 0       | 0       | 3       | 4       | 0       | 1       | 0       | 0       | 0       | 2       | 0       | 1       | 0       | 1       |
| 2f   |    | 1       | 0       | 0       | 2       | 5       | 0      | 1      | 1      | 2      | 3      | 2      | 4      | 0       | 0       | 3       | 1       | 9       | 4       | 2       | 0       | 1       | 0       | 3       | 8       | 0       | 1       | 0       | 0       | 2       | 4       | 0       | 1       | 0       | 0       |
| 2h   |    | 2       | 1       | 0       | 1       | 5       | 0      | 0      | 2      | 1      | 2      | 0      | 6      | 0       | 0       | 5       | 1       | 5       | 8       | 5       | 0       | 6       | 0       | 1       | 3       | 0       | 1       | 0       | 0       | 4       | 3       | 0       | 0       | 0       | 1       |
| 2g   |    | 1       | 4       | 0       | 0       | 1       | 0      | 0      | 0      | 0      | 2      | 0      | 2      | 0       | 0       | 3       | 0       | 5       | 0       | 5       | 0       | 0       | 0       | 4       | 3       | 1       | 1       | 0       | 0       | 2       | 4       | 0       | 0       | 0       | 0       |
| 2i   |    | 1       | 2       | 0       | 0       | 5       | 0      | 0      | 1      | 0      | 2      | 0      | 1      | 0       | 0       | 3       | 1       | 5       | 4       | 4       | 0       | 5       | 0       | 2       | 3       | 0       | 1       | 0       | 0       | 4       | 4       | 0       | 0       | 0       | 0       |
| 7i   |    | 3       | 4       | 0       | 0       | 2       | 0      | 0      | 0      | 0      | 7      | 0      | 12     | 0       | 0       | 4       | 0       | 7       | 2       | 3       | 0       | 6       | 0       | 4       | 5       | 0       | 0       | 1       | 1       | 7       | 6       | 0       | 1       | 0       | 1       |
| 7g   |    | 3       | 0       | 0       | 0       | 5       | 0      | 0      | 3      | 1      | 1      | 0      | 6      | 0       | 1       | 6       | 3       | 4       | 9       | 2       | 0       | 4       | 0       | 6       | 3       | 0       | 1       | 0       | 0       | 4       | 3       | 0       | 1       | 0       | 0       |
| 7a   |    | 1       | 1       | 0       | 2       | 4       | 0      | 0      | 2      | 0      | 1      | 1      | 10     | 0       | 0       | 3       | 2       | 9       | 5       | 2       | 0       | 5       | 0       | 3       | 3       | 0       | 0       | 0       | 0       | 4       | 4       | 0       | 1       | 0       | 0       |
| 7e   |    | 4       | 0       | 0       | 1       | 5       | 0      | 0      | 2      | 0      | 0      | 0      | 7      | 0       | 0       | 5       | 2       | 8       | 6       | 5       | 2       | 5       | 0       | 8       | 8       | 0       | 1       | 0       | 0       | 8       | 3       | 0       | 3       | 0       | 3       |
| 7f   |    | 3       | 3       | 0       | 0       | 0       | 0      | 0      | 0      | 0      | 4      | 0      | 8      | 0       | 0       | 1       | 0       | 5       | 0       | 6       | 0       | 6       | 0       | 2       | 3       | 0       | 0       | 0       | 0       | 7       | 7       | 0       | 0       | 0       | 1       |
| 7h   |    | 1       | 2       | 0       | 2       | 5       | 0      | 0      | 2      | 0      | 1      | 2      | 9      | 0       | 0       | 5       | 1       | 9       | 6       | 6       | 0       | 7       | 0       | 5       | 3       | 1       | 2       | 0       | 0       | 3       | 4       | 0       | 1       | 0       | 0       |
| 7b   |    | 3       | 2       | 0       | 0       | 2       | 0      | 0      | 0      | 0      | 4      | 0      | 11     | 0       | 0       | 6       | 0       | 11      | 3       | 2       | 0       | 7       | 0       | 4       | 6       | 0       | 0       | 0       | 0       | 11      | 3       | 0       | 1       | 0       | 0       |
| 7c   |    | 3       | 0       | 0       | 0       | 4       | 0      | 0      | 2      | 0      | 1      | 0      | 5      | 0       | 1       | 4       | 2       | 8       | 7       | 4       | 0       | 4       | 0       | 6       | 5       | 0       | 1       | 0       | 0       | 5       | 2       | 0       | 1       | 0       | 0       |
| 7d   |    | 3       | 3       | 0       | 0       | 2       | 0      | 0      | 0      | 0      | 3      | 0      | 8      | 0       | 0       | 8       | 0       | 12      | 3       | 2       | 0       | 3       | 0       | 3       | 4       | 0       | 1       | 0       | 0       | 8       | 4       | 0       | 3       | 0       | 1       |
| 7j   |    | 2       | 6       | 0       | 5       | 4       | 0      | 0      | 0      | 0      | 1      | 2      | 8      | 0       | 0       | 6       | 3       | 8       | 6       | 5       | 0       | 10      | 0       | 7       | 5       | 0       | 0       | 0       | 0       | 4       | 4       | 0       | 1       | 0       | 3       |
| TS2  |    | 2       | X       | 2       | 8       | X       | 5      | 0      | X      | 7      | X      | 3      | X      | 0       | X       | 1       | X       | 2       | X       | 0       | 0       | X       | 1       | 6       | X       | 1       | X       | 0       | X       | 5       | X       | 1       | X       | 0       | 0       |
| NQ-h |    | 2       | 2       | 0       | 3       | 7       | 1      | 1      | 5      | 0      | 2      | 2      | 5      | 0       | 0       | 7       | 2       | 9       | 8       | 1       | 0       | 4       | 0       | 3       | 2       | 0       | 1       | 0       | 0       | 3       | 0       | 0       | 1       | 0       | 1       |
| NQ-g |    | 0       | 0       | 0       | 3       | 7       | 1      | 1      | 5      | 0      | 3      | 1      | 6      | 0       | 0       | 7       | 0       | 12      | 7       | 3       | 0       | 2       | 0       | 7       | 6       | 0       | 2       | 0       | 0       | 1       | 2       | 0       | 2       | 0       | 0       |
| NQ-d |    | 5       | 3       | 0       | 1       | 4       | 0      | 1      | 2      | 0      | 2      | 1      | 3      | 0       | 0       | 4       | 1       | 4       | 4       | 2       | 0       | 2       | 0       | 6       | 8       | 0       | 1       | 0       | 0       | 6       | 3       | 0       | 0       | 0       | 2       |

**Table S2.** Protein-ligand interaction profiles for naphthoquinones and controls (continued).

| TR   | GR | 459GLYA | 465ALAA | 461HISA | 467HISA | 462PROA | 468PROA | 463THRA | 469THRA | 466GLUA | 472GLUA | 467GLUA | 473GLUA | 469CYSA | 470SERA | 472ARGA | 478ARGA | 54VALB | 59VALB | 59VALB | 64VALB |
|------|----|---------|---------|---------|---------|---------|---------|---------|---------|---------|---------|---------|---------|---------|---------|---------|---------|--------|--------|--------|--------|
| 2b   |    | 5       | 1       | 2       | 3       | 1       | 2       | 0       | 0       | 10      | 4       | 3       | 3       | 0       | 0       | 0       | 0       | 0      | 0      | 0      | 2      |
| 2a   |    | 5       | 0       | 3       | 2       | 1       | 0       | 0       | 0       | 16      | 5       | 5       | 7       | 0       | 0       | 1       | 2       | 0      | 0      | 0      | 0      |
| 2c   |    | 3       | 1       | 4       | 3       | 2       | 2       | 0       | 0       | 13      | 6       | 7       | 6       | 0       | 0       | 0       | 0       | 0      | 0      | 0      | 2      |
| 2e   |    | 1       | 1       | 2       | 3       | 1       | 3       | 0       | 0       | 7       | 3       | 3       | 7       | 0       | 0       | 0       | 3       | 1      | 0      | 0      | 1      |
| 2d   |    | 1       | 2       | 3       | 3       | 0       | 2       | 0       | 0       | 4       | 3       | 3       | 4       | 0       | 0       | 0       | 4       | 0      | 0      | 0      | 1      |
| 2f   |    | 2       | 1       | 1       | 1       | 1       | 2       | 0       | 0       | 11      | 2       | 4       | 3       | 0       | 0       | 0       | 2       | 0      | 0      | 0      | 0      |
| 2h   |    | 3       | 1       | 3       | 2       | 0       | 0       | 0       | 0       | 11      | 0       | 3       | 4       | 0       | 0       | 0       | 1       | 0      | 0      | 2      | 0      |
| 2g   |    | 3       | 0       | 3       | 4       | 1       | 2       | 0       | 1       | 10      | 0       | 2       | 1       | 0       | 0       | 0       | 4       | 0      | 0      | 0      | 2      |
| 2i   |    | 1       | 1       | 2       | 1       | 1       | 1       | 0       | 1       | 11      | 0       | 3       | 6       | 0       | 0       | 0       | 0       | 0      | 0      | 0      | 0      |
| 7i   |    | 2       | 0       | 0       | 2       | 1       | 3       | 2       | 0       | 10      | 0       | 0       | 3       | 0       | 0       | 0       | 3       | 0      | 0      | 0      | 3      |
| 7g   |    | 3       | 3       | 1       | 4       | 0       | 0       | 0       | 0       | 11      | 1       | 1       | 2       | 0       | 0       | 1       | 7       | 0      | 0      | 1      | 0      |
| 7a   |    | 3       | 2       | 1       | 2       | 0       | 2       | 0       | 1       | 4       | 1       | 3       | 2       | 0       | 0       | 0       | 3       | 0      | 0      | 0      | 0      |
| 7e   |    | 2       | 2       | 4       | 2       | 0       | 1       | 0       | 0       | 8       | 0       | 2       | 1       | 0       | 0       | 0       | 7       | 0      | 0      | 1      | 0      |
| 7f   |    | 1       | 0       | 4       | 5       | 0       | 3       | 1       | 0       | 8       | 0       | 1       | 1       | 0       | 0       | 0       | 0       | 0      | 0      | 0      | 3      |
| 7h   |    | 3       | 1       | 1       | 1       | 0       | 0       | 0       | 0       | 8       | 1       | 2       | 0       | 1       | 0       | 0       | 4       | 0      | 0      | 0      | 0      |
| 7b   |    | 0       | 0       | 3       | 2       | 2       | 2       | 1       | 0       | 16      | 0       | 0       | 3       | 0       | 0       | 0       | 1       | 0      | 0      | 0      | 1      |
| 7c   |    | 3       | 2       | 0       | 4       | 1       | 1       | 0       | 0       | 10      | 1       | 3       | 2       | 0       | 0       | 0       | 9       | 0      | 0      | 0      | 0      |
| 7d   |    | 1       | 0       | 3       | 3       | 1       | 2       | 2       | 0       | 13      | 0       | 1       | 3       | 0       | 0       | 0       | 5       | 0      | 0      | 0      | 2      |
| 7j   |    | 3       | 3       | 0       | 5       | 0       | 2       | 0       | 0       | 4       | 0       | 2       | 2       | 0       | 0       | 0       | 4       | 0      | 0      | 1      | 2      |
| TS2  |    | 4       | X       | 9       | X       | 0       | X       | 8       | X       | 12      | X       | 1       | X       | 1       | 2       | 2       | X       | 0      | X      | 1      | X      |
| NQ-h |    | 1       | 2       | 4       | 3       | 3       | 1       | 0       | 0       | 4       | 0       | 0       | 1       | 0       | 0       | 0       | 1       | 1      | 0      | 3      | 1      |
| NQ-g |    | 1       | 0       | 2       | 0       | 2       | 1       | 0       | 0       | 8       | 0       | 0       | 0       | 0       | 0       | 0       | 2       | 0      | 1      | 0      | 0      |
| NQ-d |    | 0       | 1       | 4       | 2       | 4       | 4       | 0       | 0       | 4       | 0       | 1       | 0       | 0       | 0       | 0       | 1       | 2      | 0      | 2      | 1      |
